# Supplementary material
Source: PubMed Central journal article supplement (PMC3811095)

***Supporting Information***

Quasi-Biomimetic Ring Contraction Catalyzed by a Cysteine-Based Nucleophile:  
Total Synthesis of Sch-642305, Some Analogs and their Putative anti-HIV  
Activities

Alpay Dermenci,<sup>a</sup> Philipp S. Selig,<sup>a</sup> Robert A. Domaoal,<sup>b</sup> Karen S. Anderson,<sup>b</sup> Krasimir A.  
Spasov,<sup>b</sup> Scott J. Miller<sup>a,\*</sup>

<sup>a</sup>*Department of Chemistry, Yale University, P.O. Box 208107, New Haven, CT 06520-8107*

<sup>b</sup>*Department of Pharmacology, Yale University School of Medicine, 333 Cedar Street, SHM  
B350B, New Haven, CT 06520*

**Supporting Information**

V. Spectral Data

(S-141)

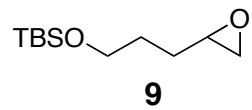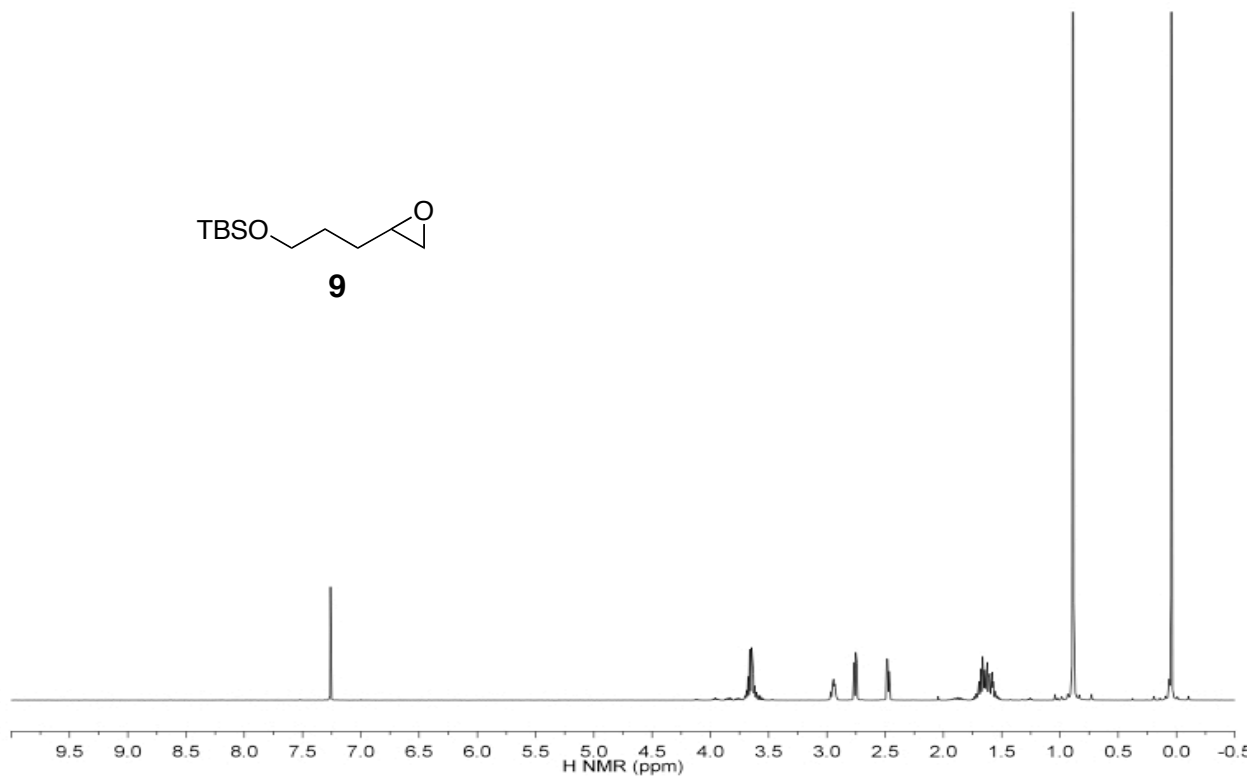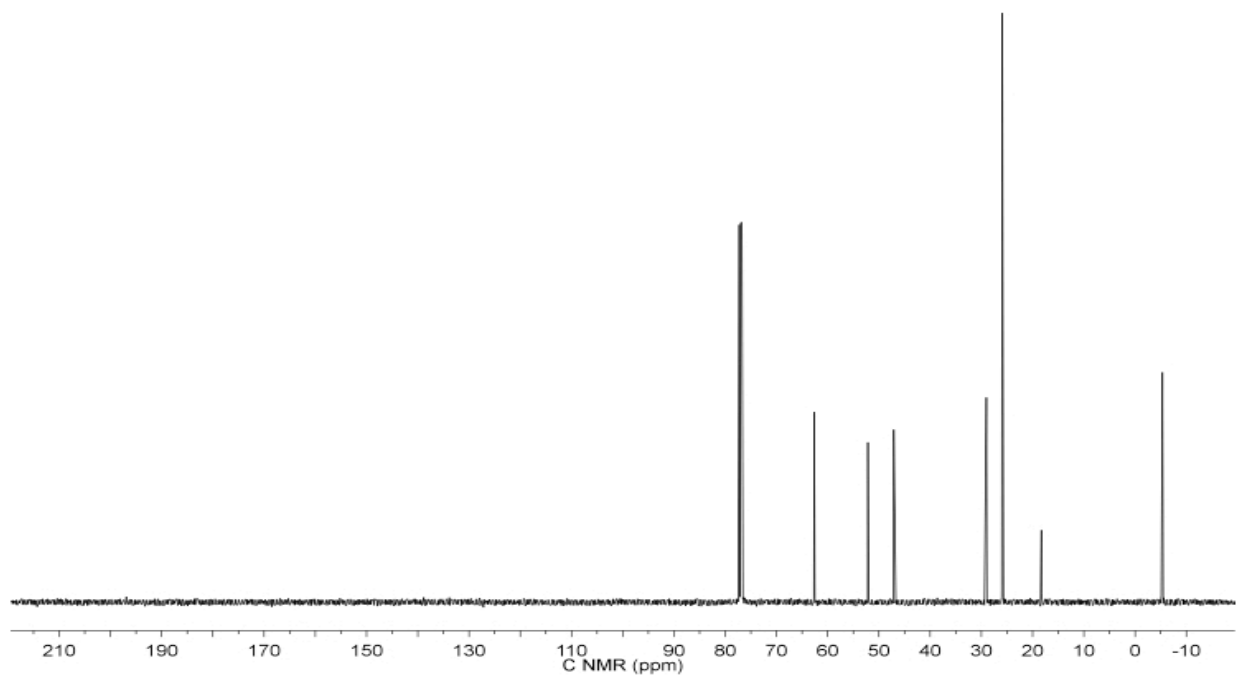

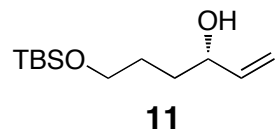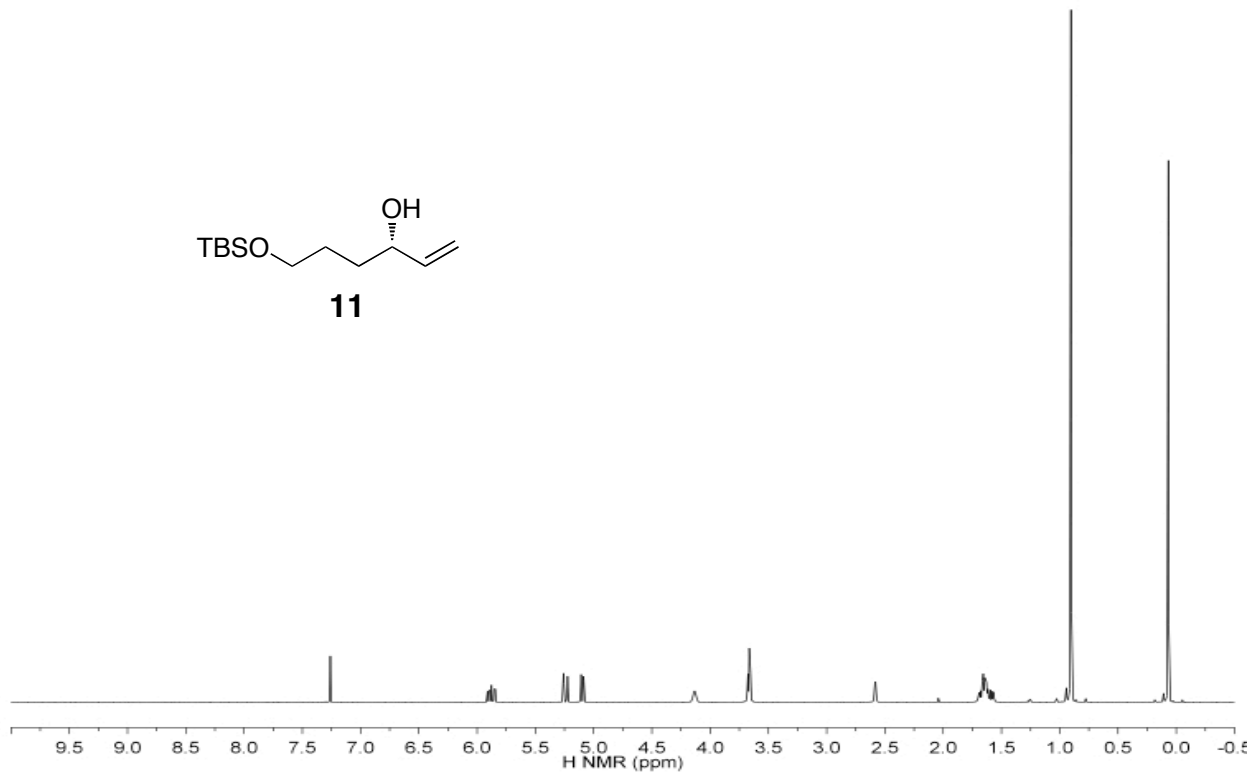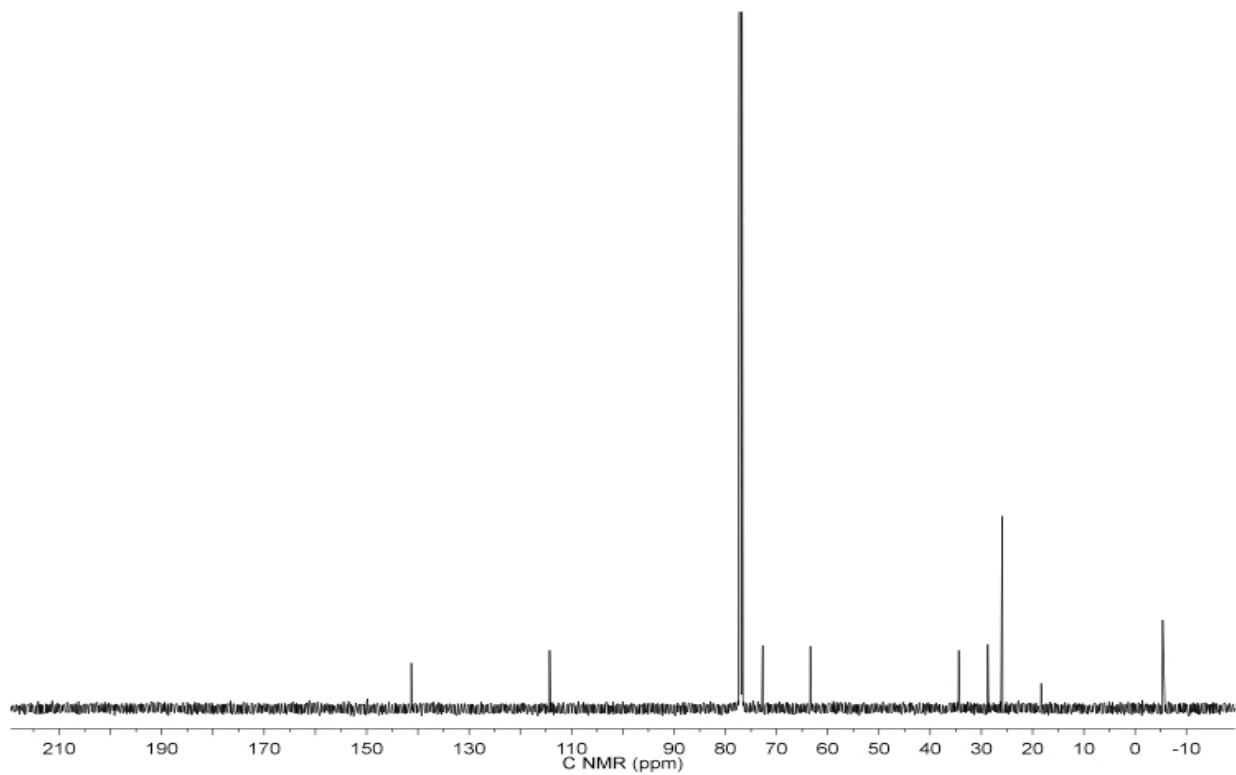

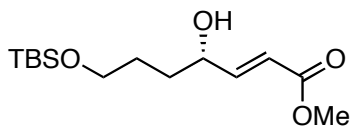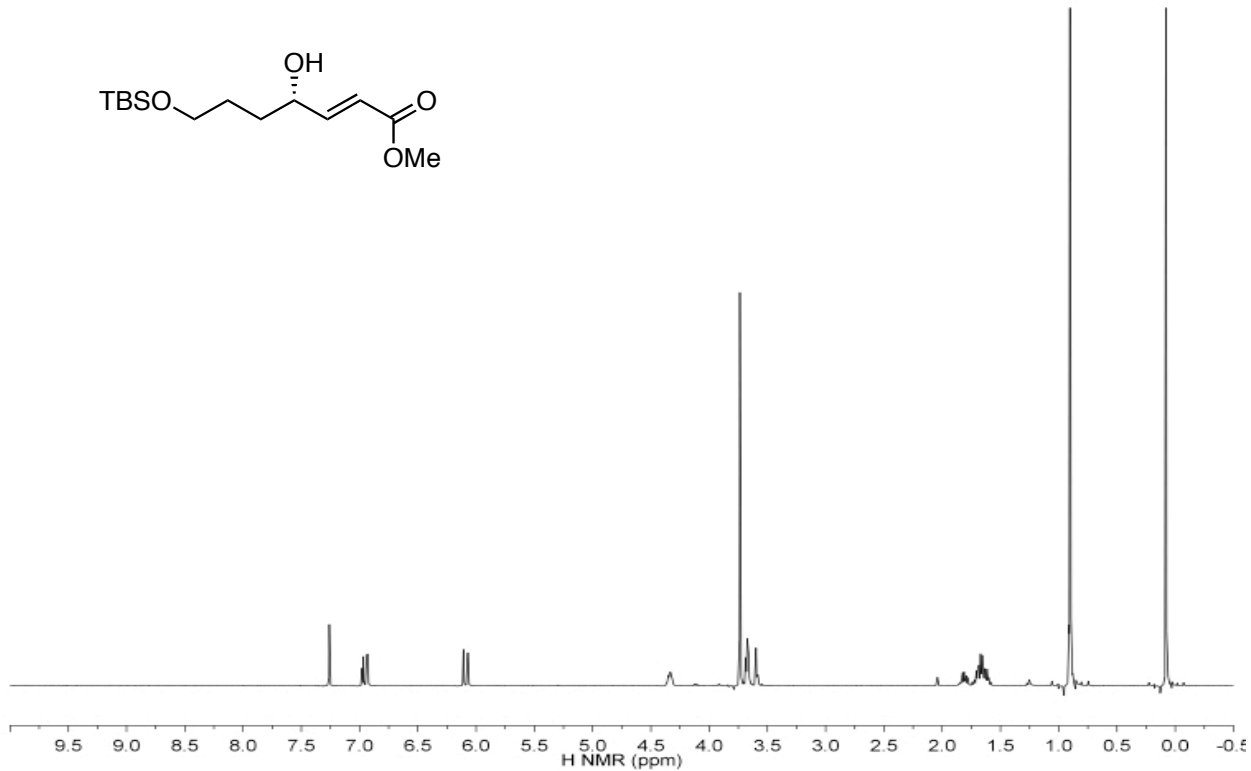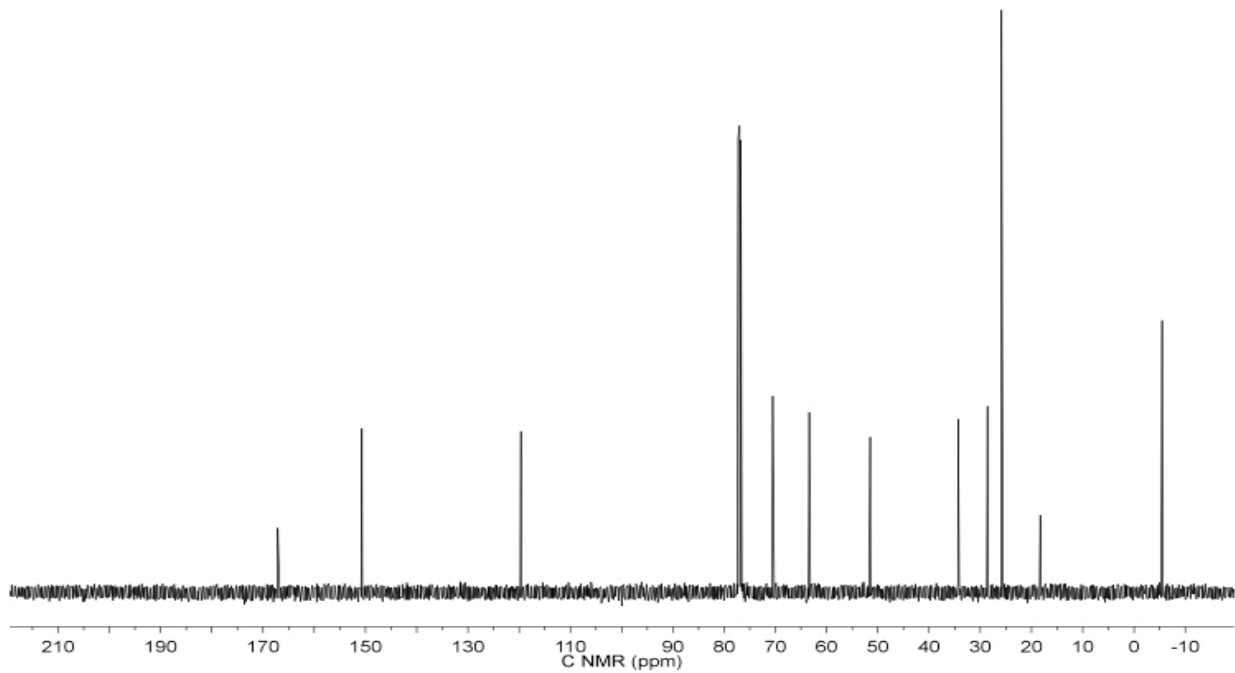



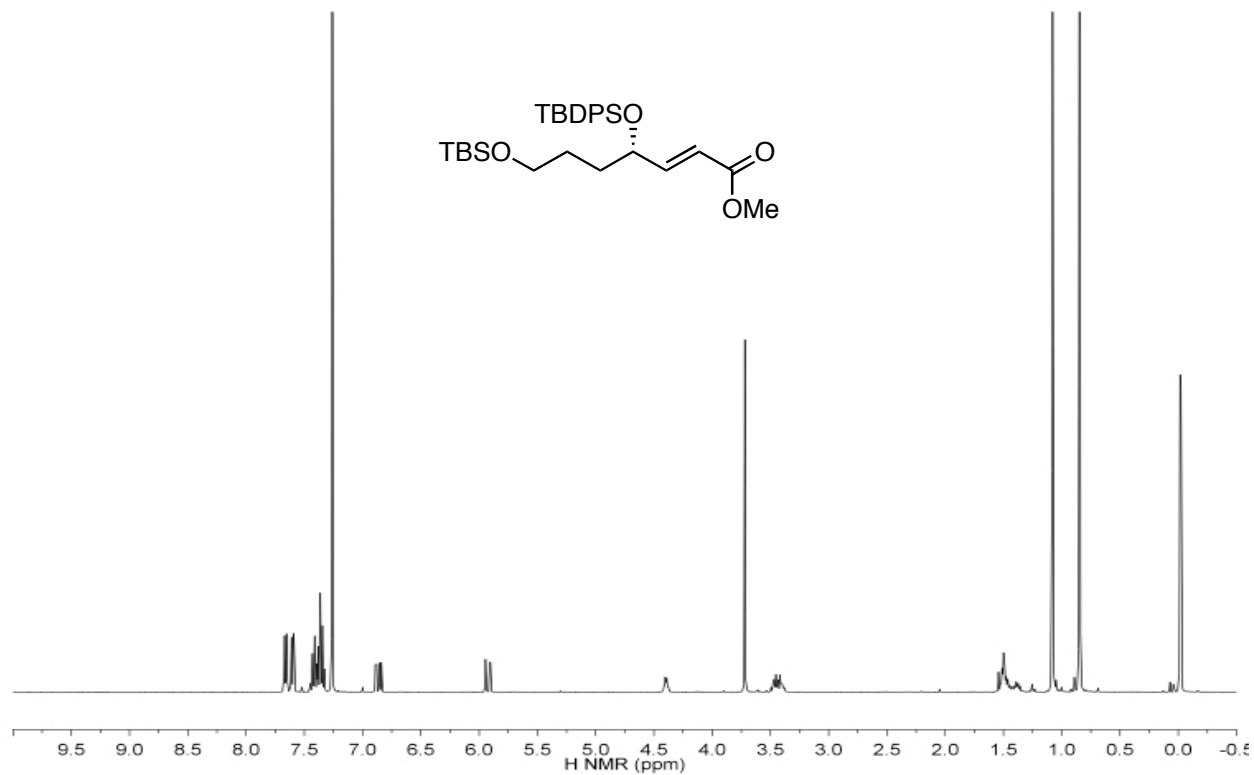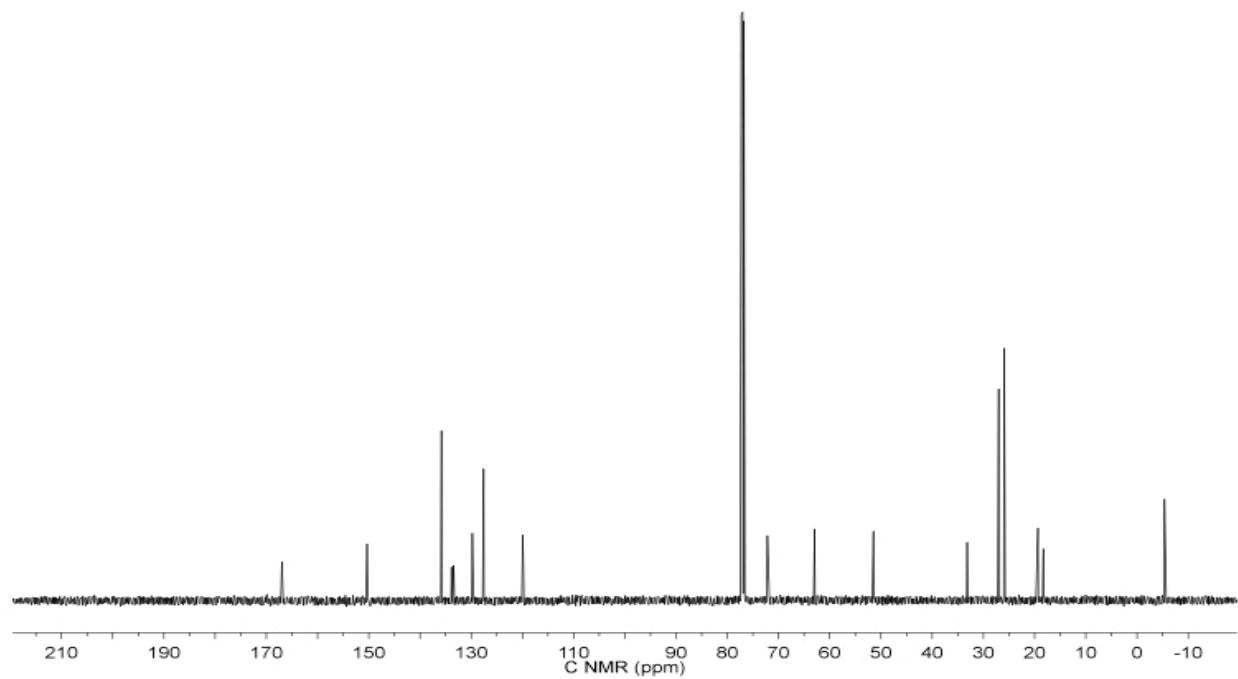

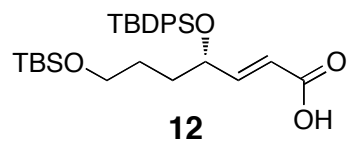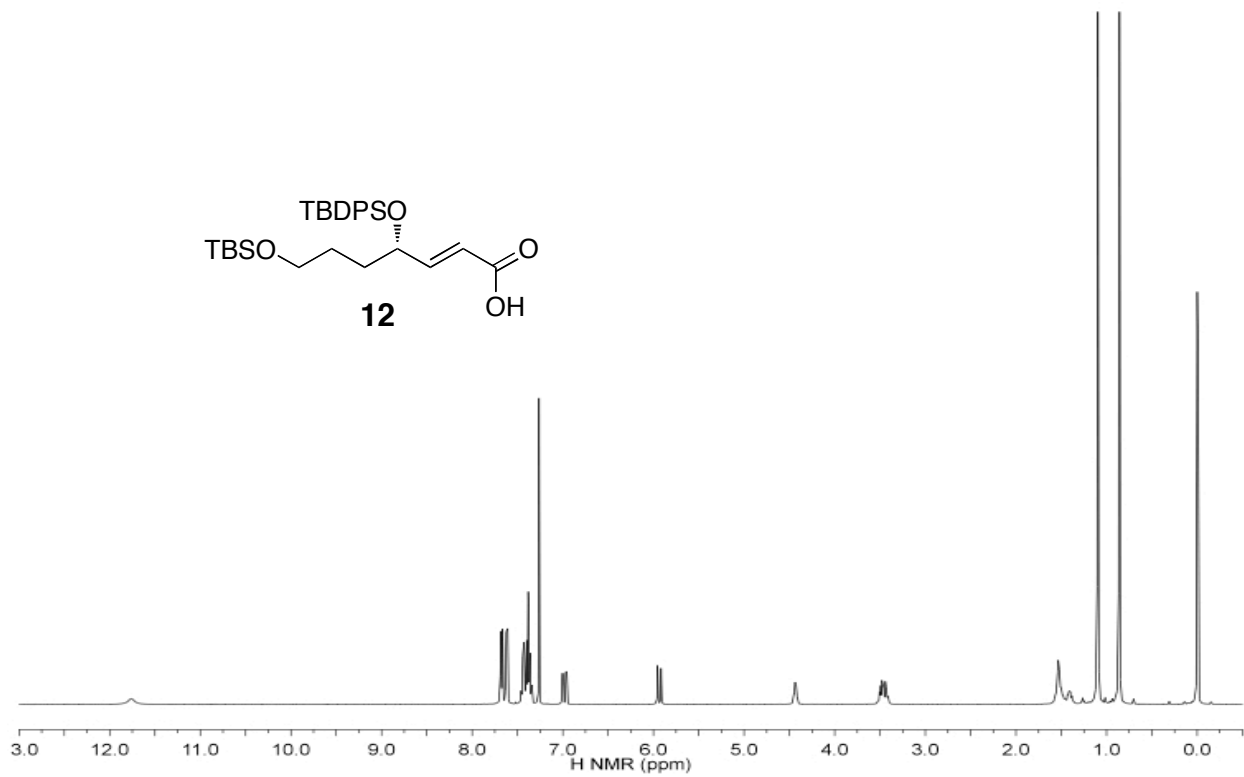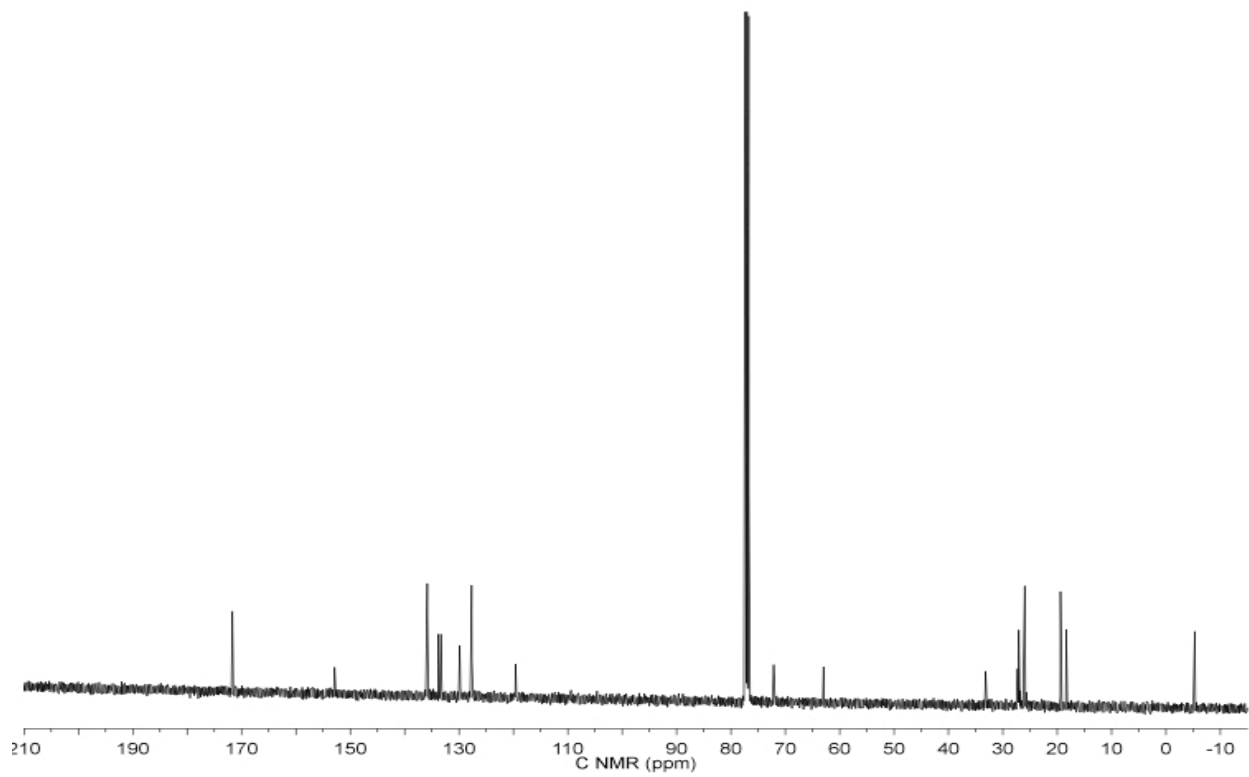

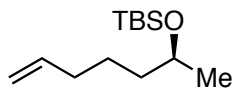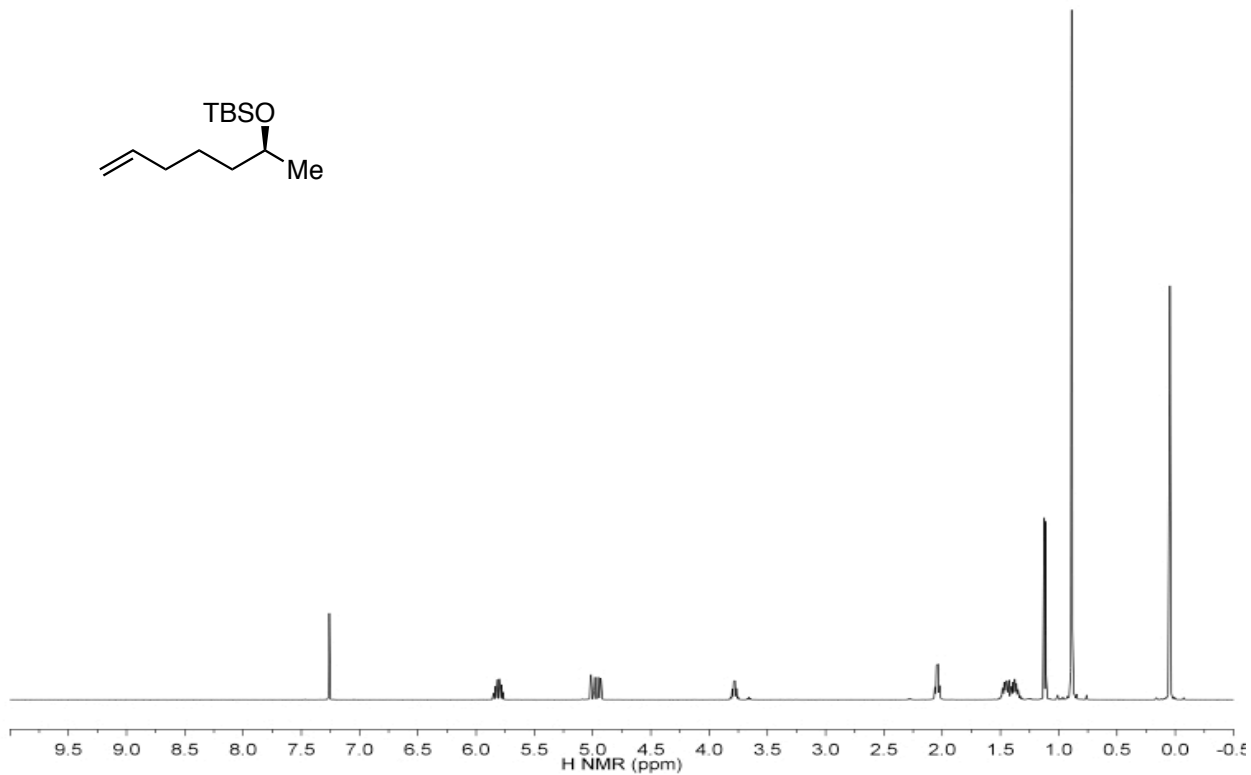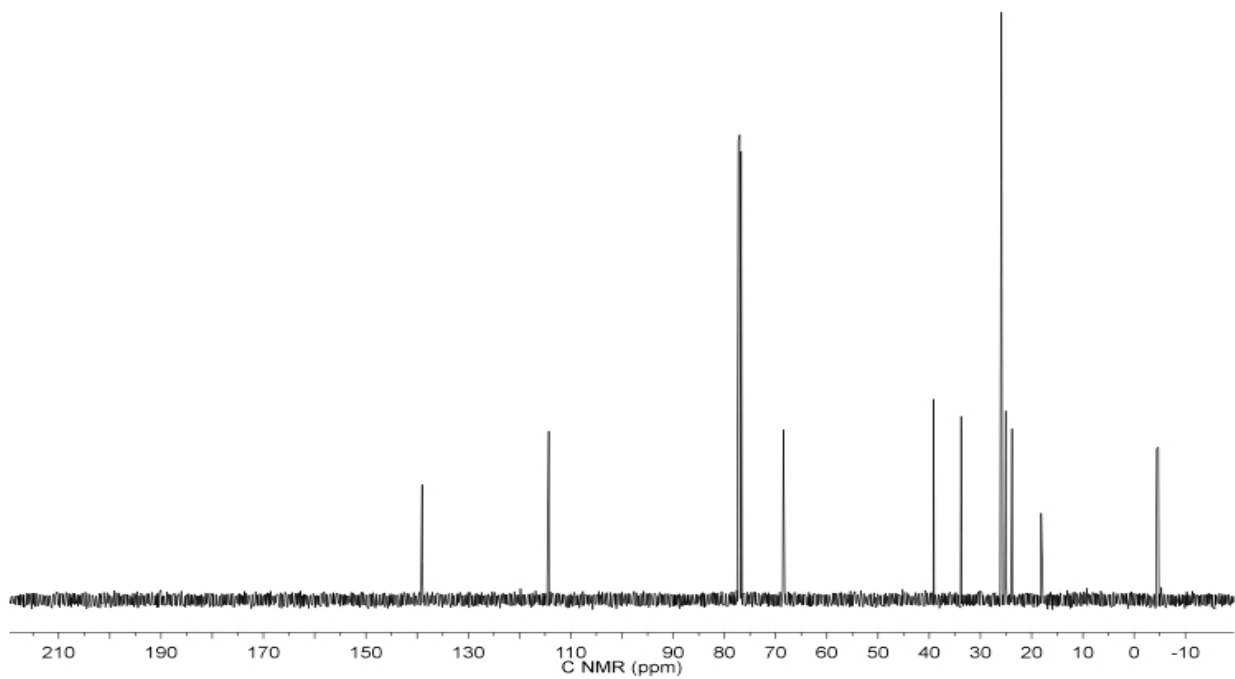

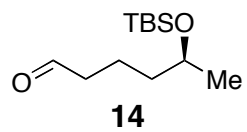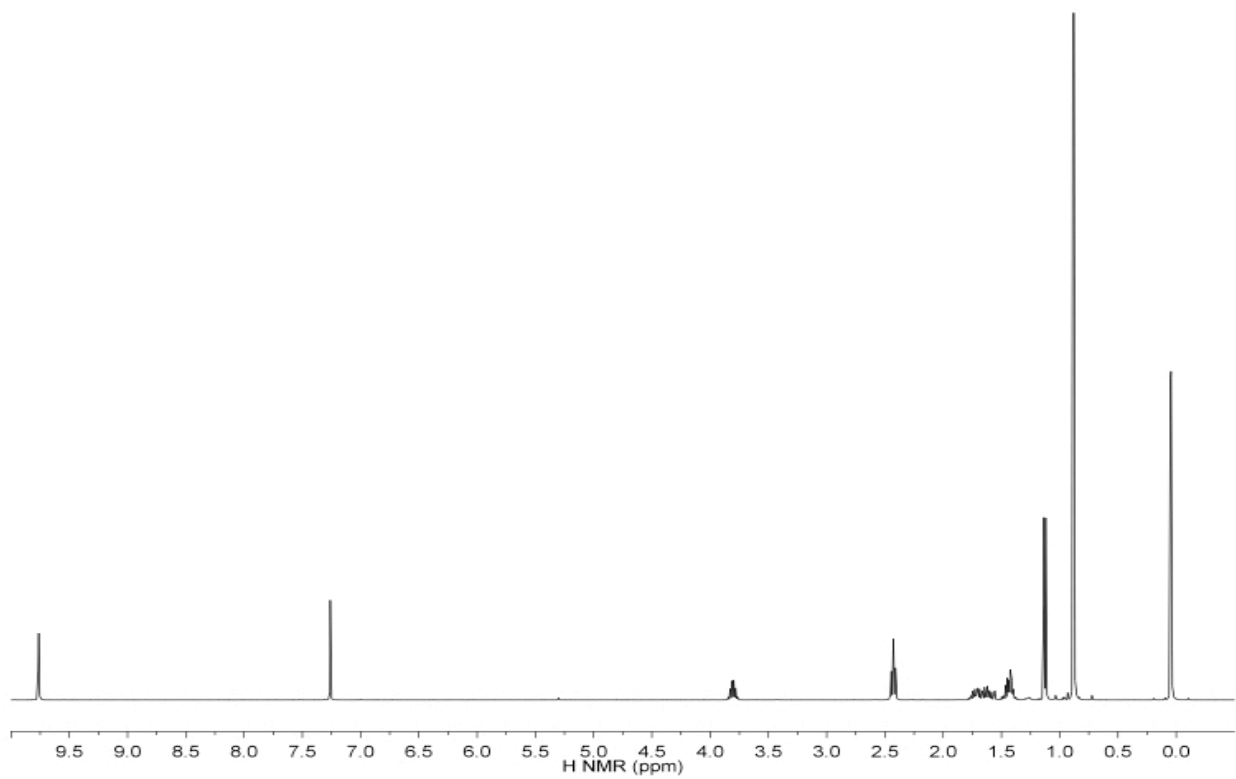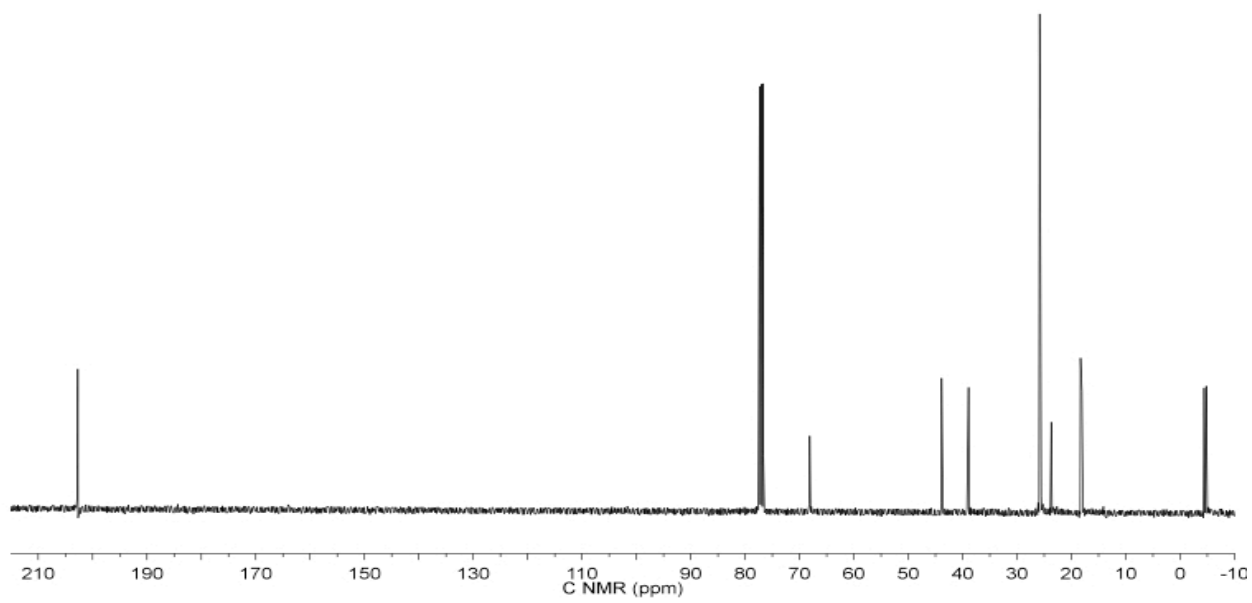

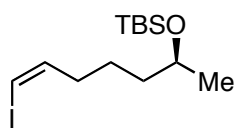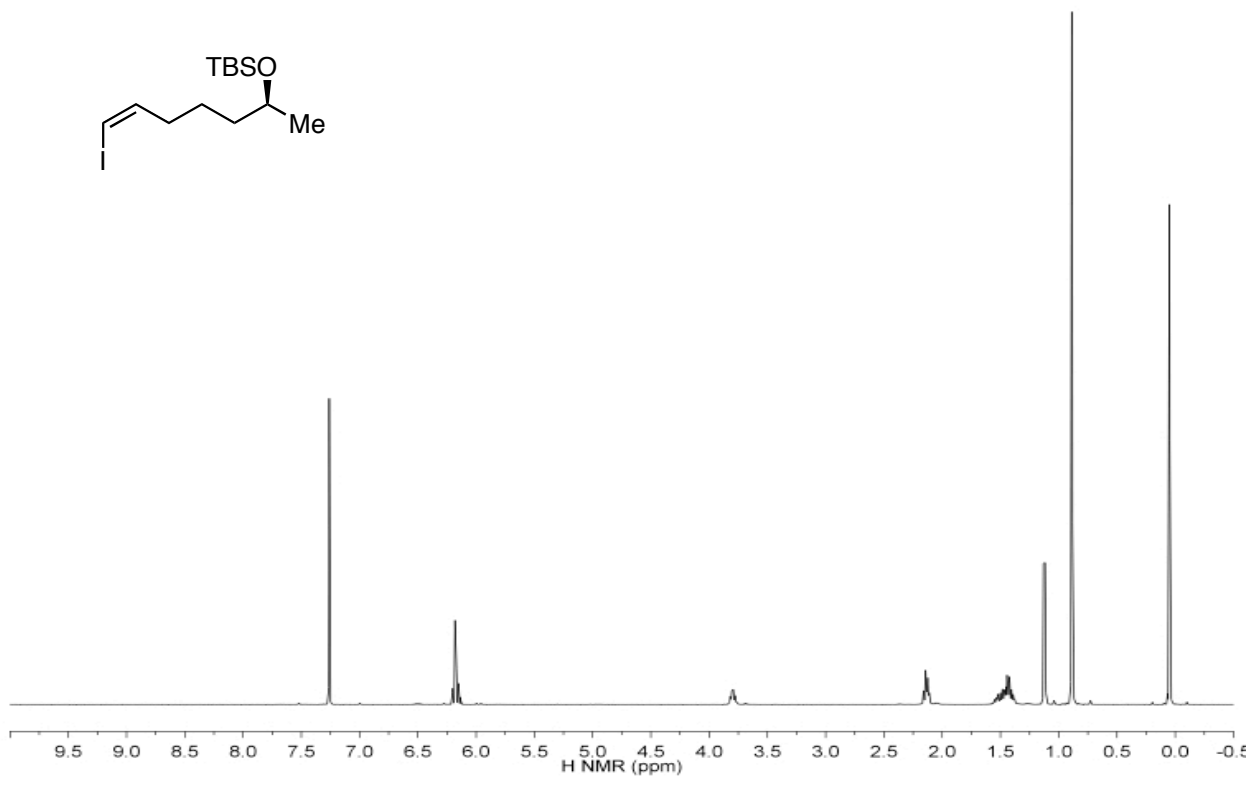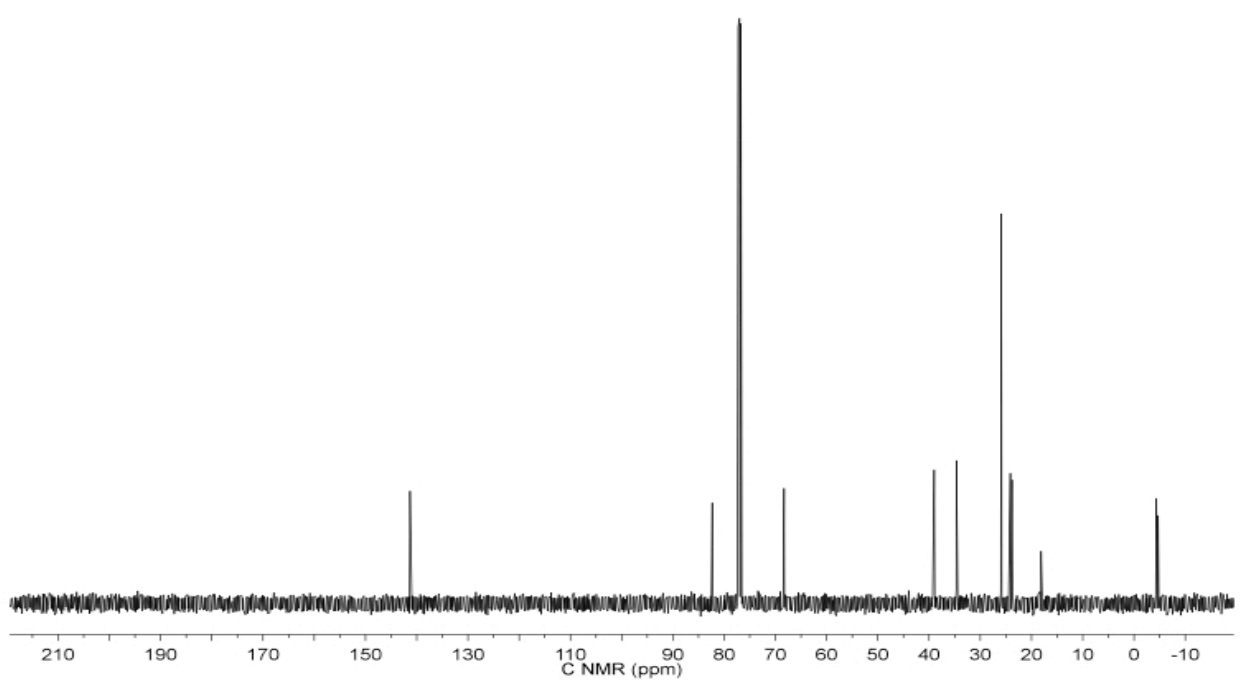

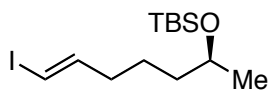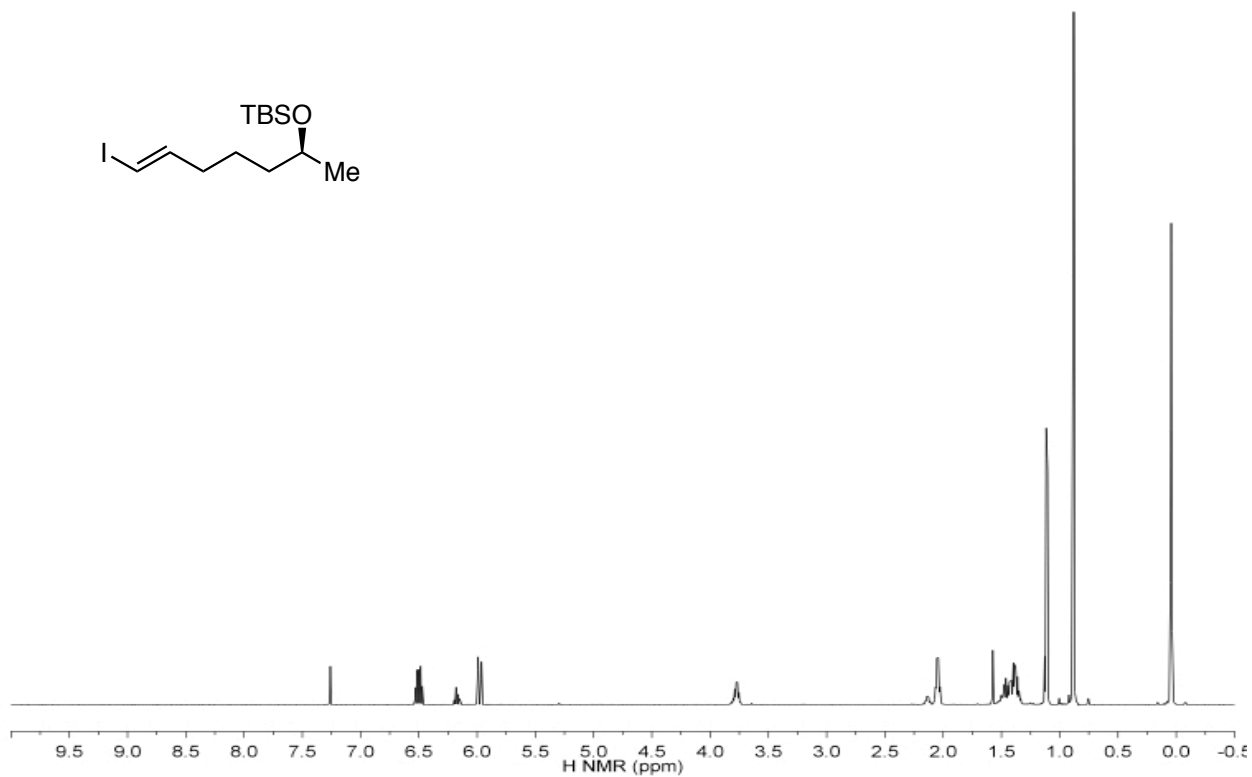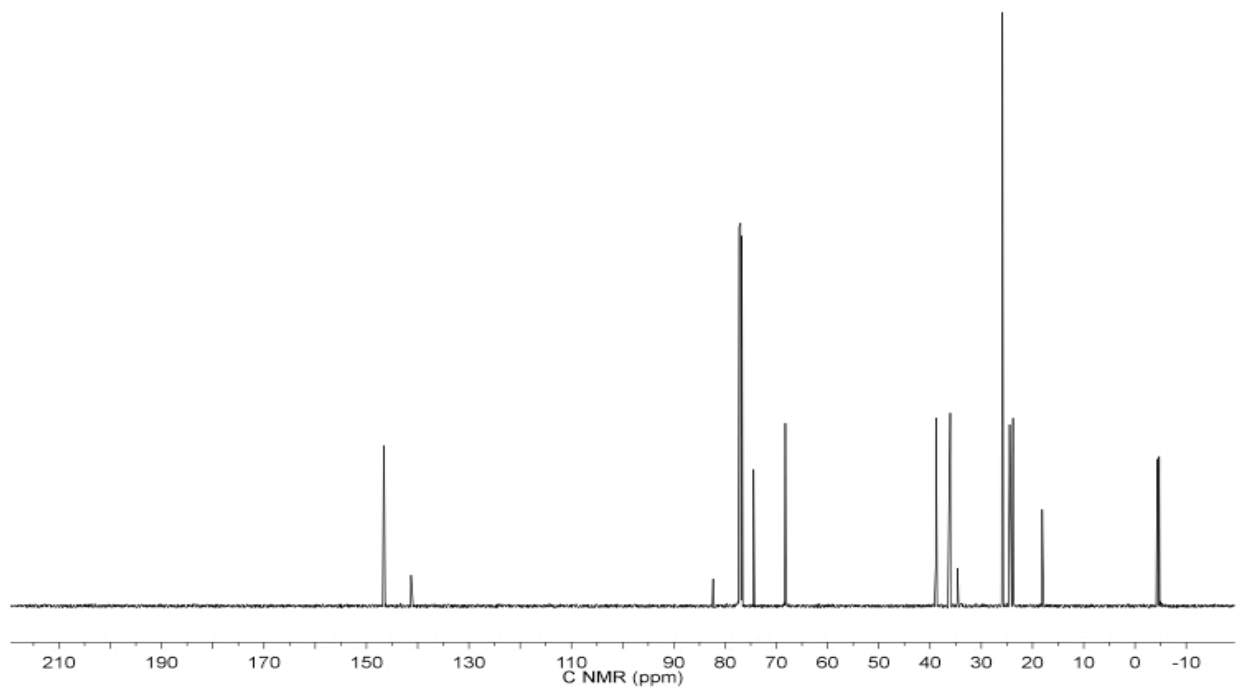

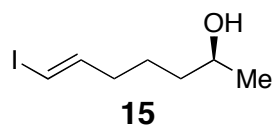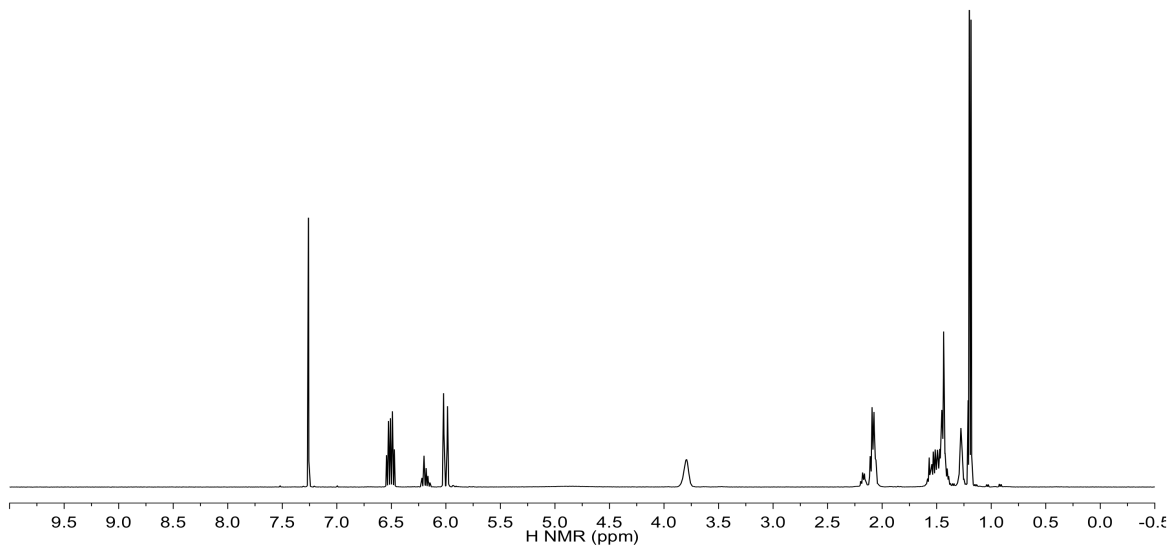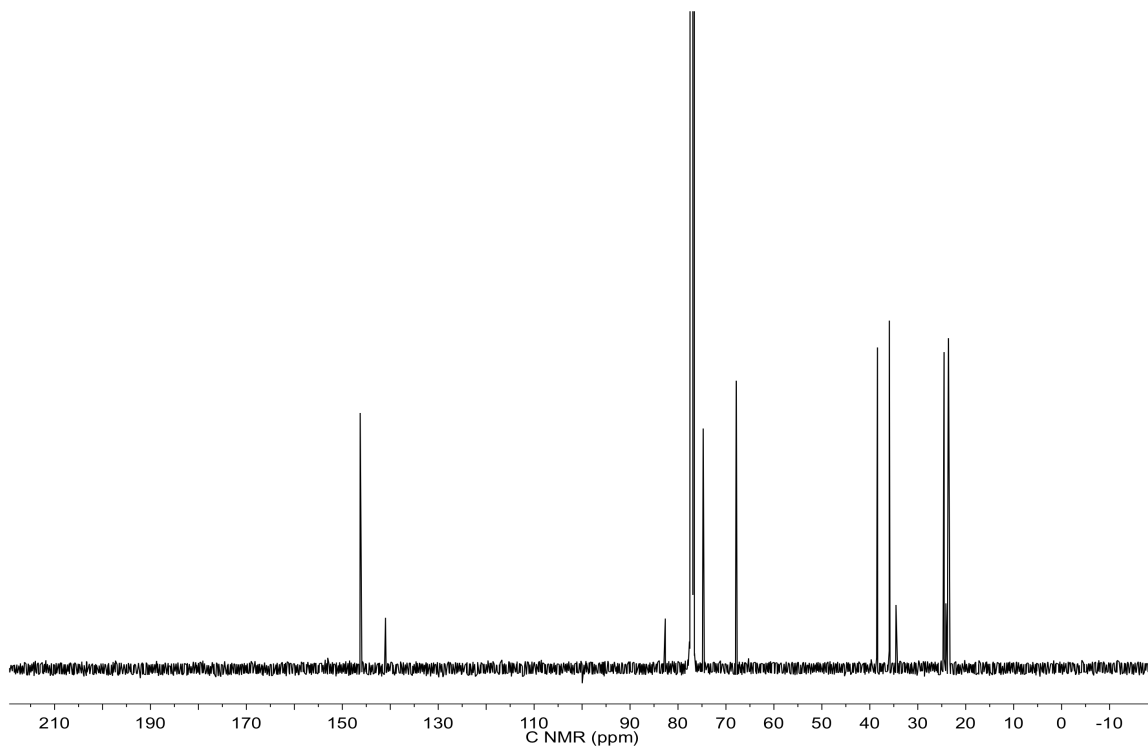

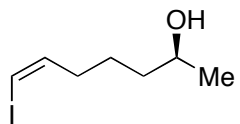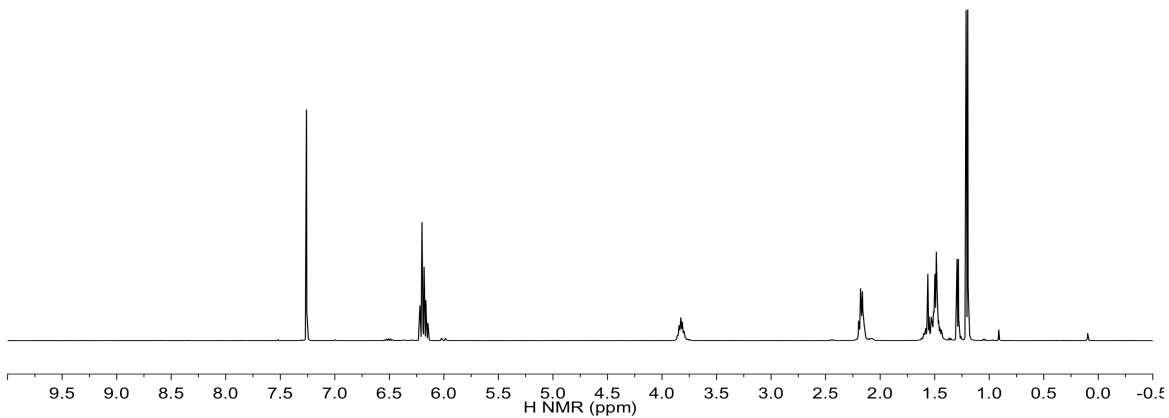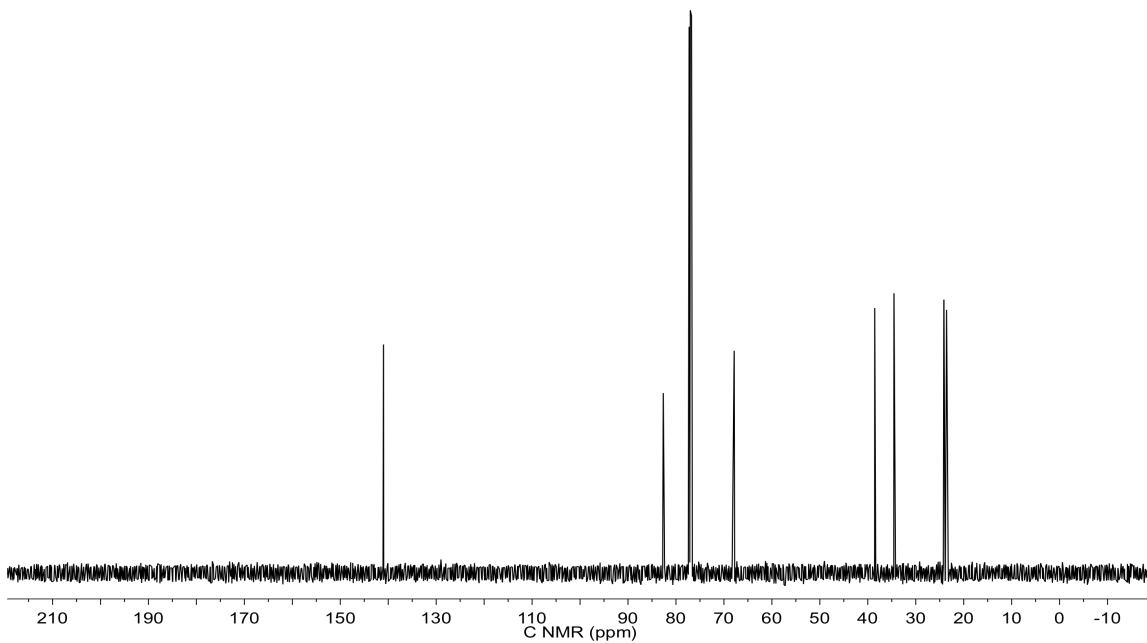



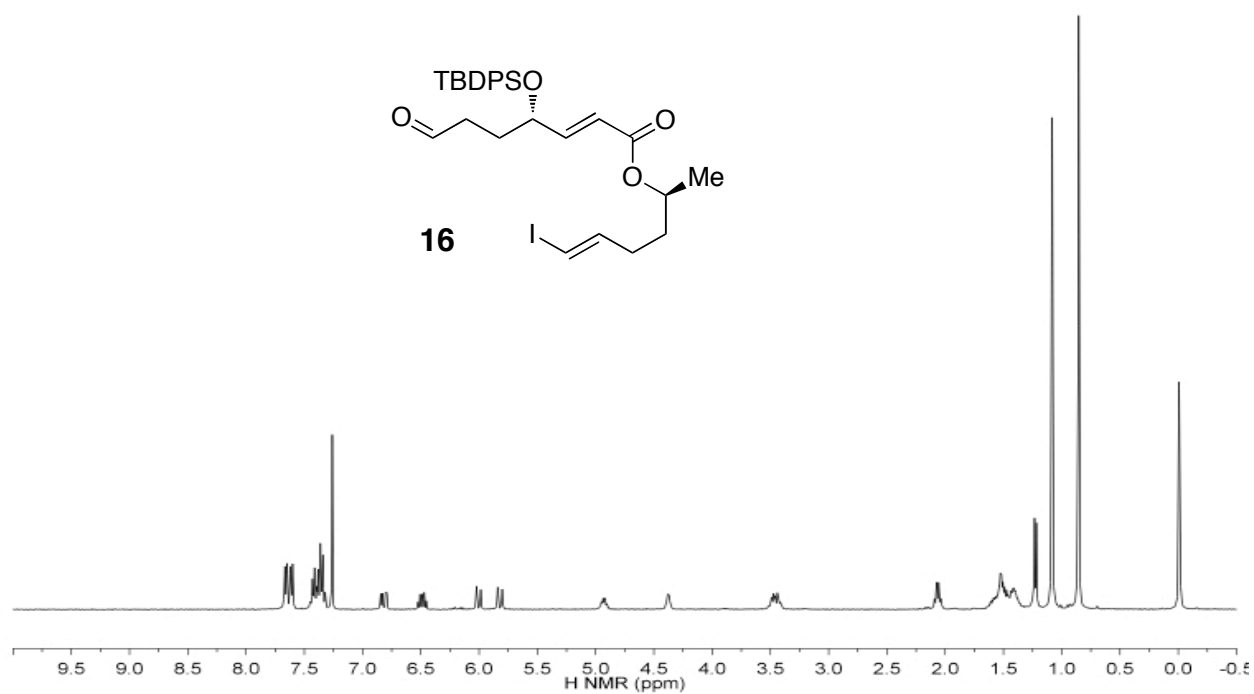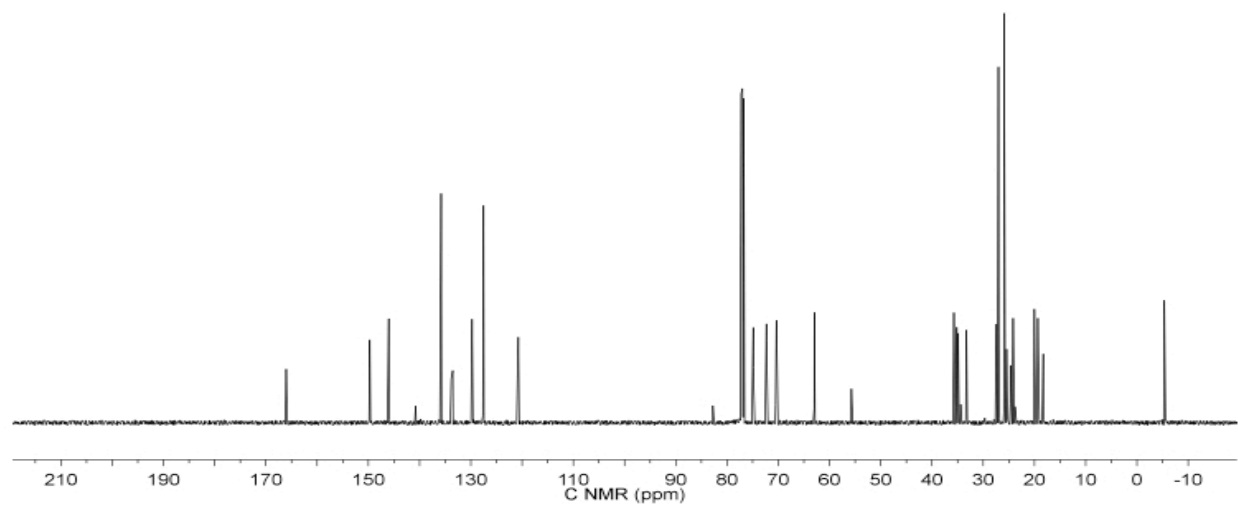

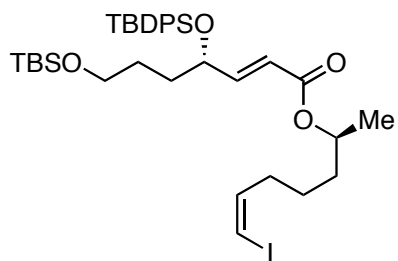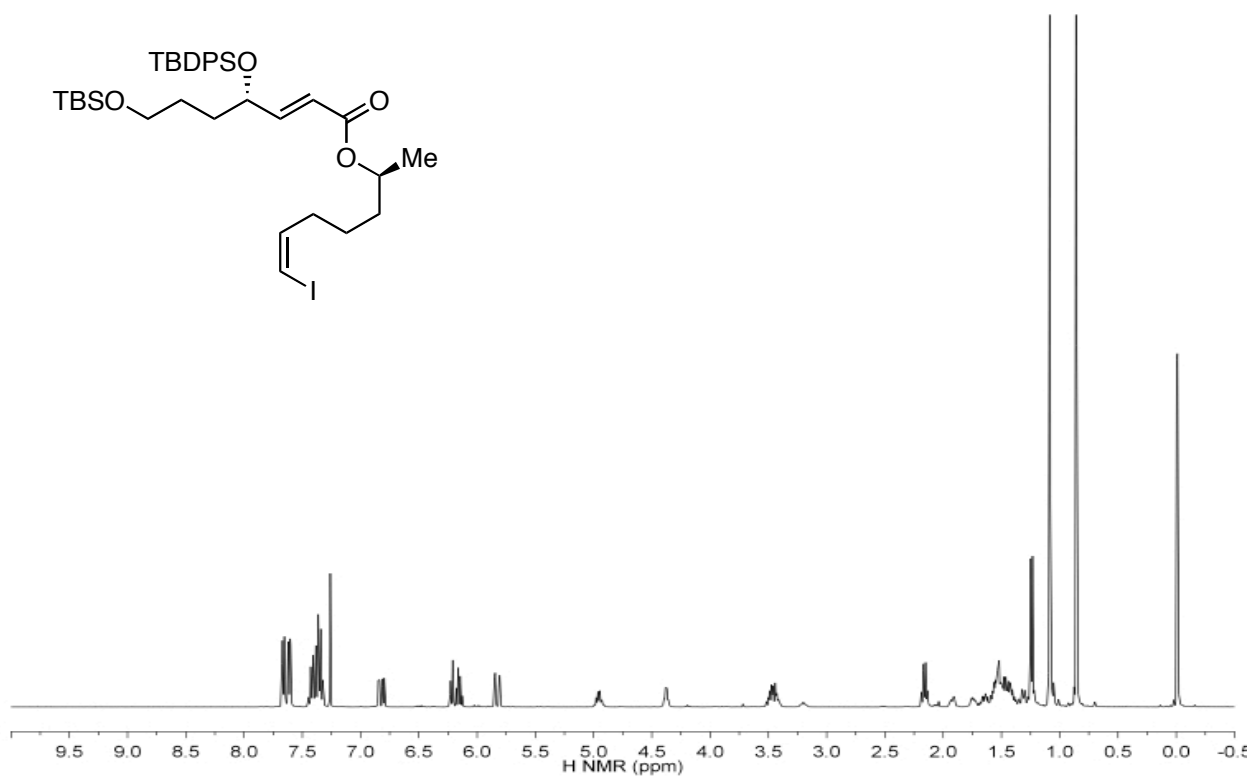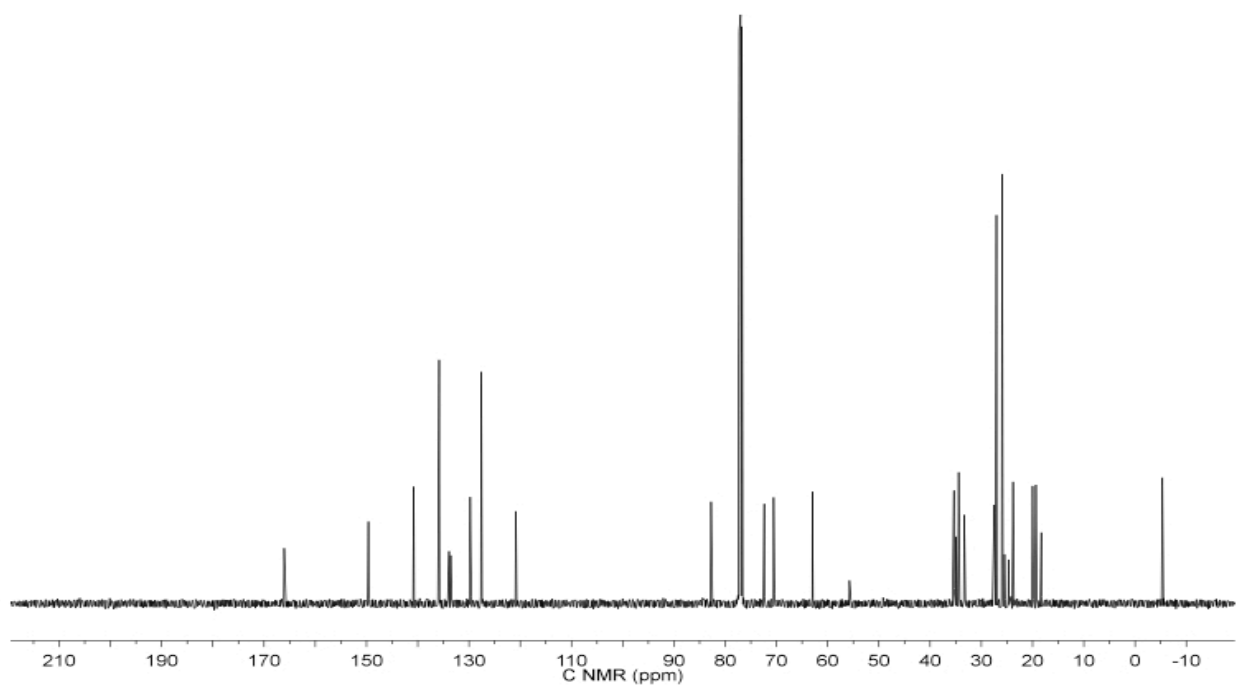

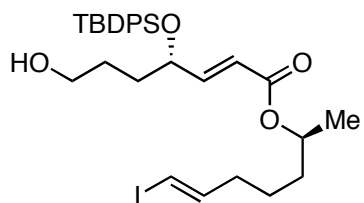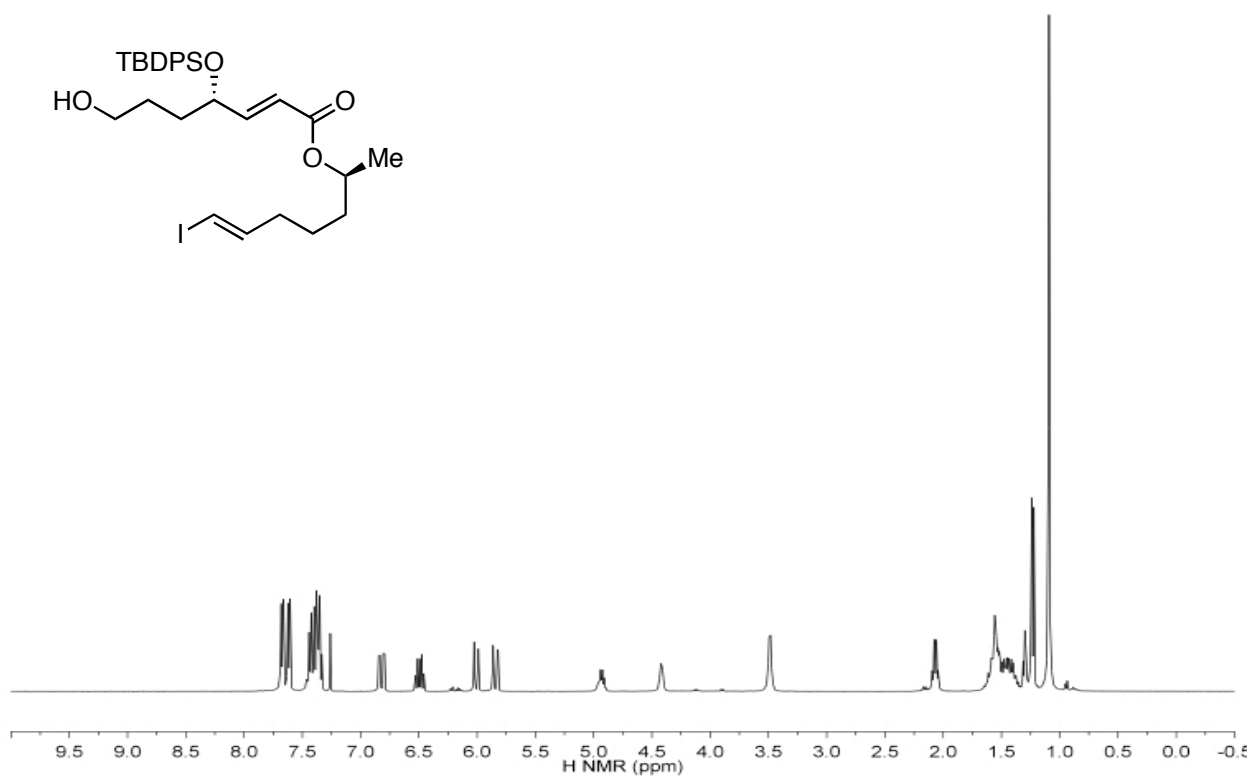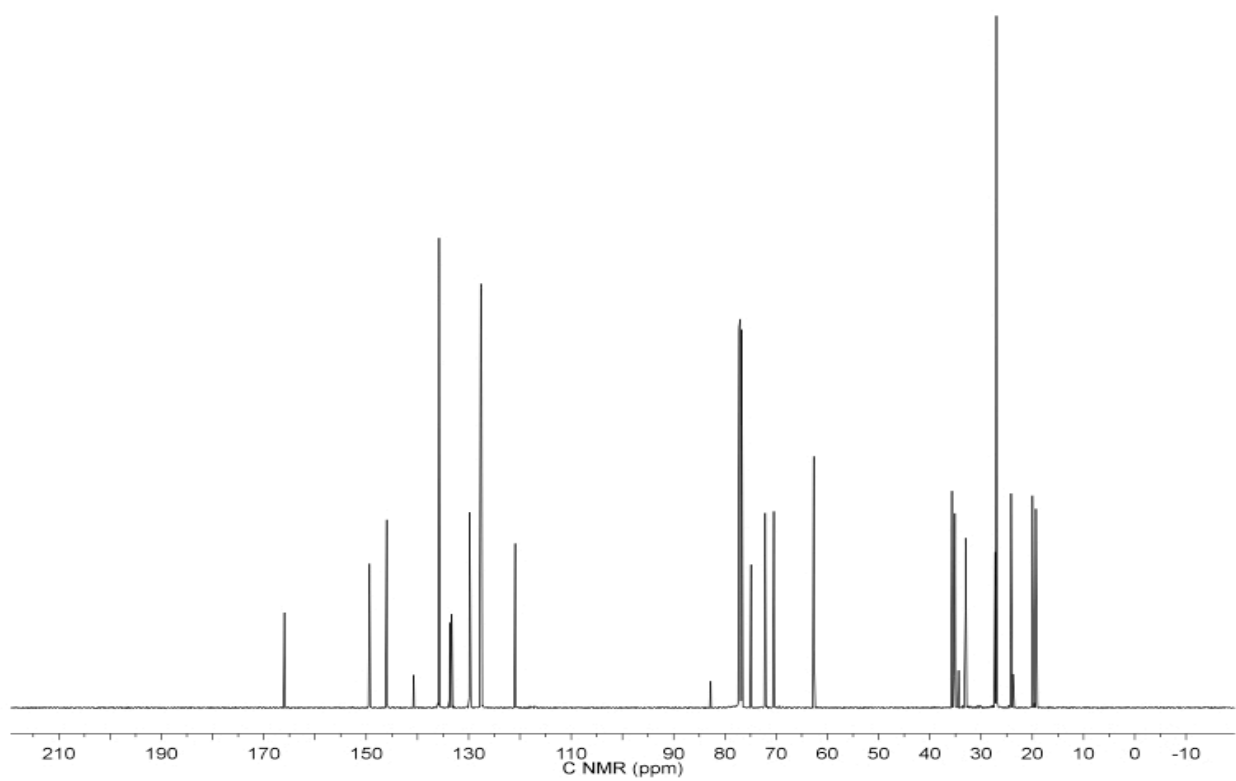

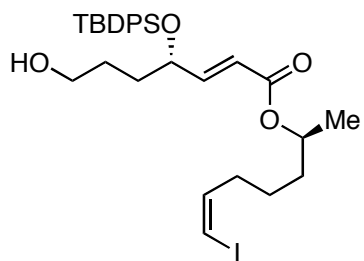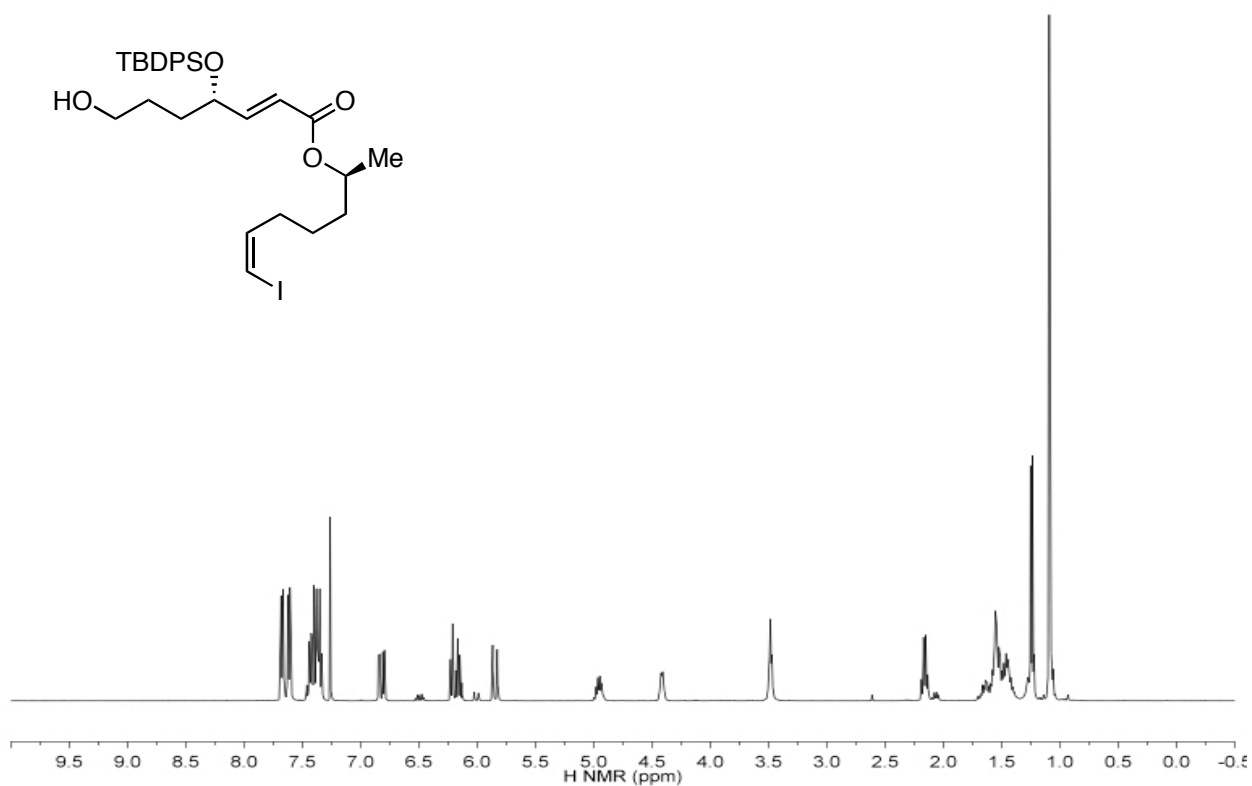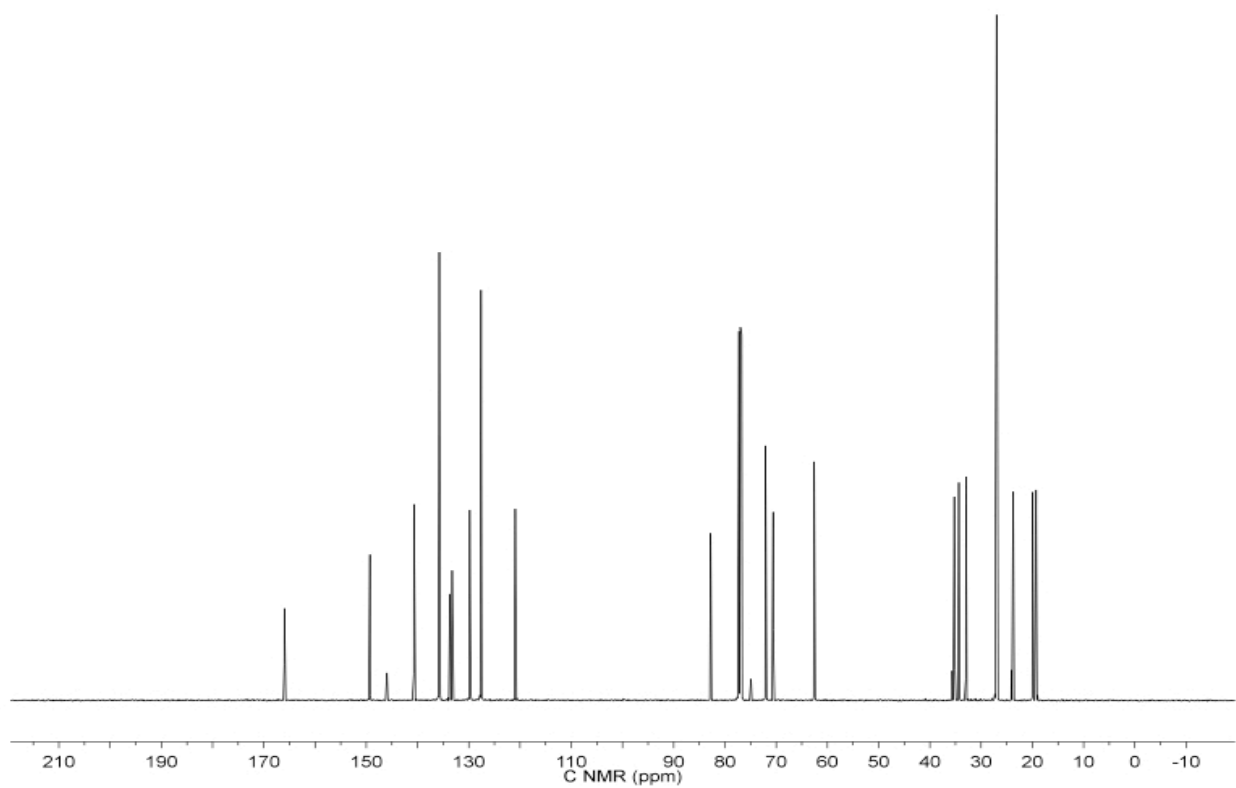

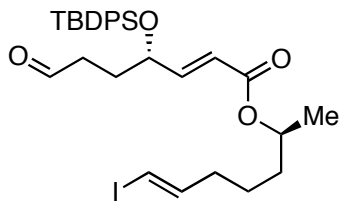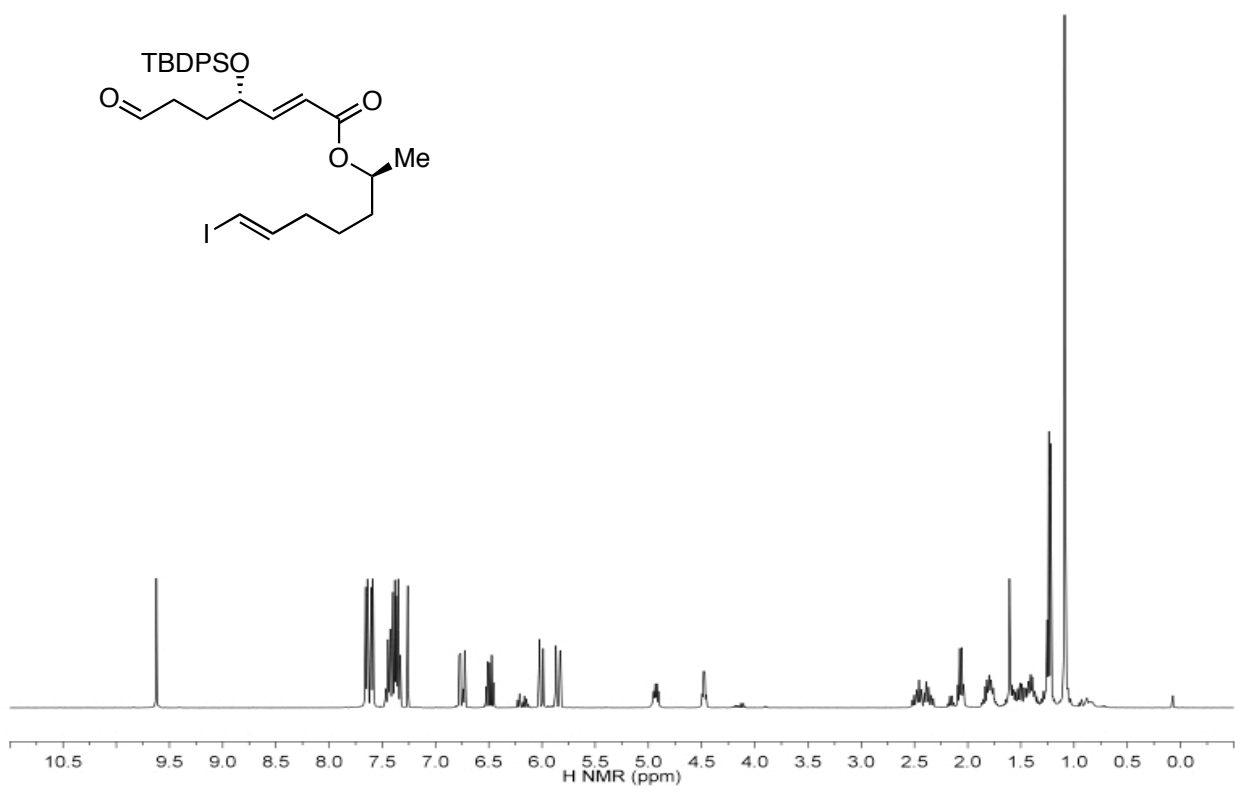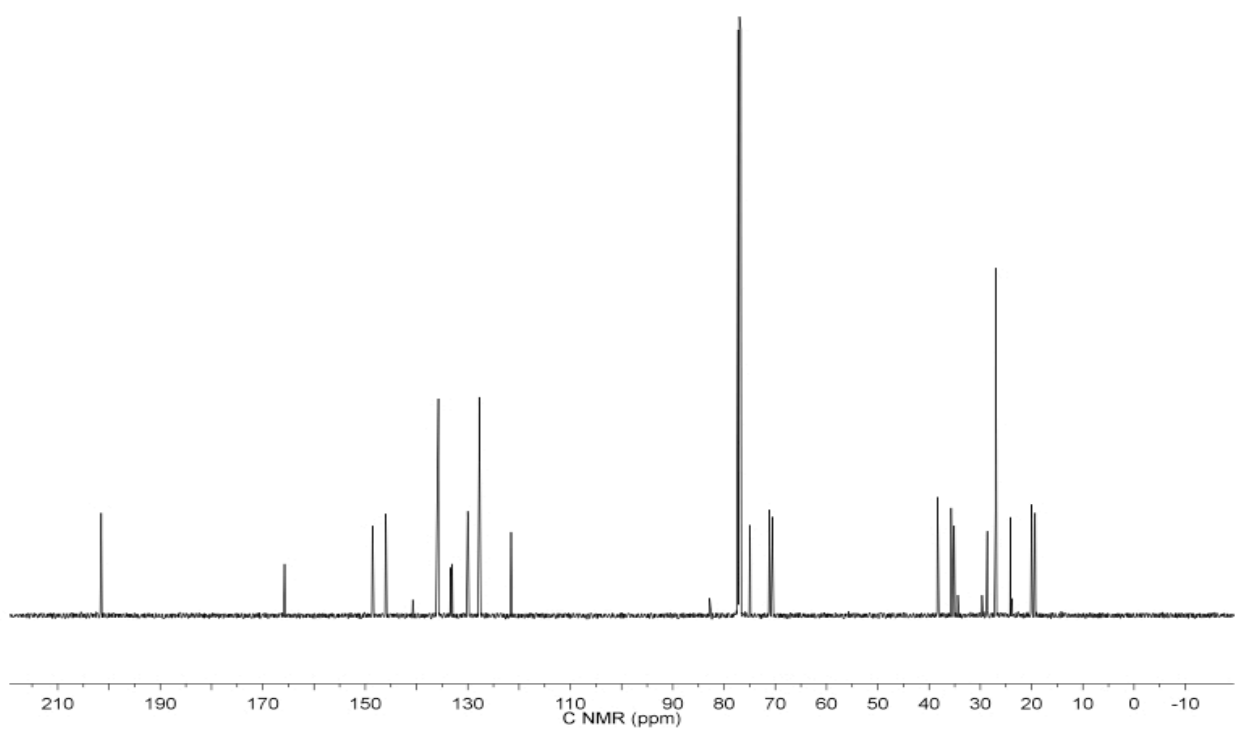

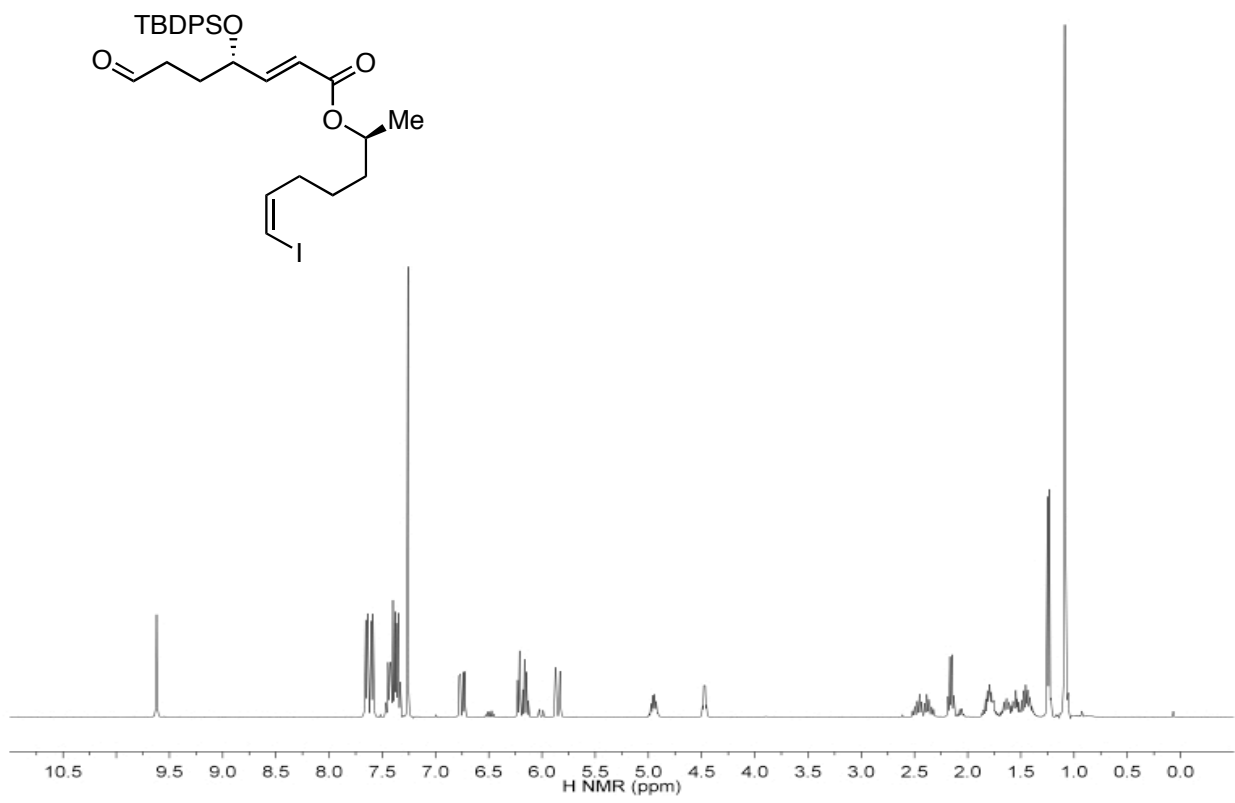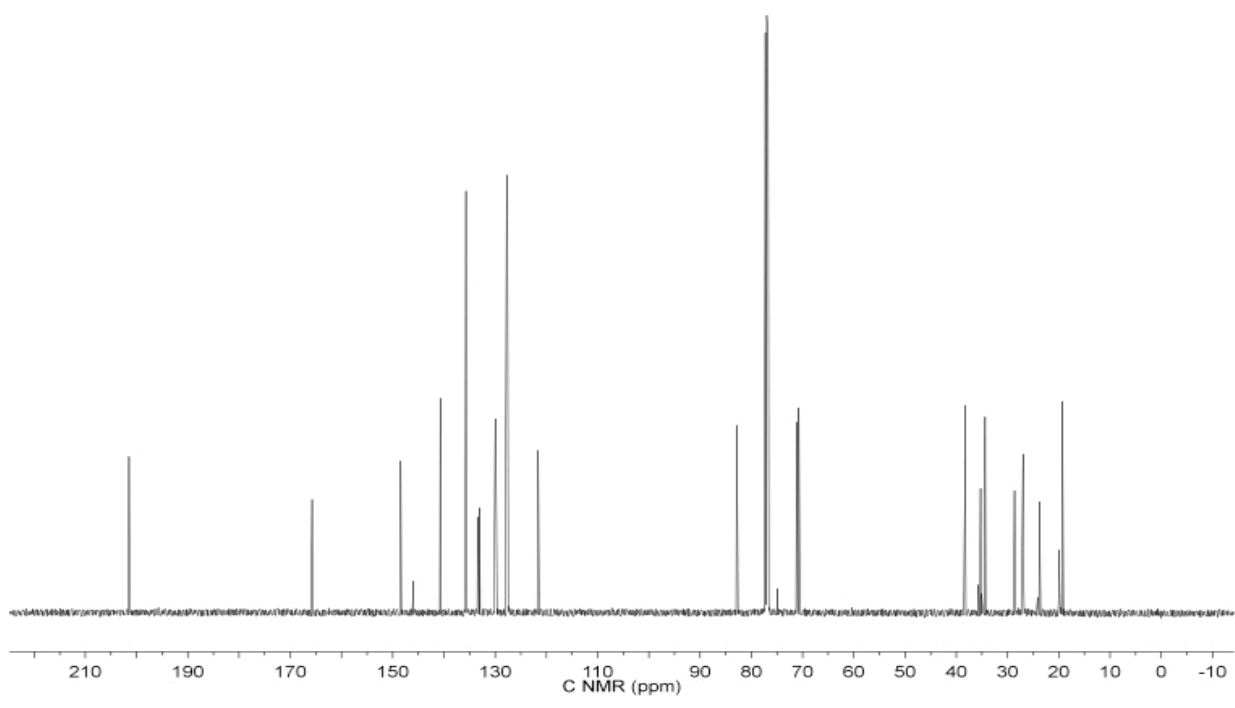

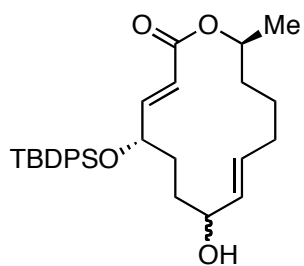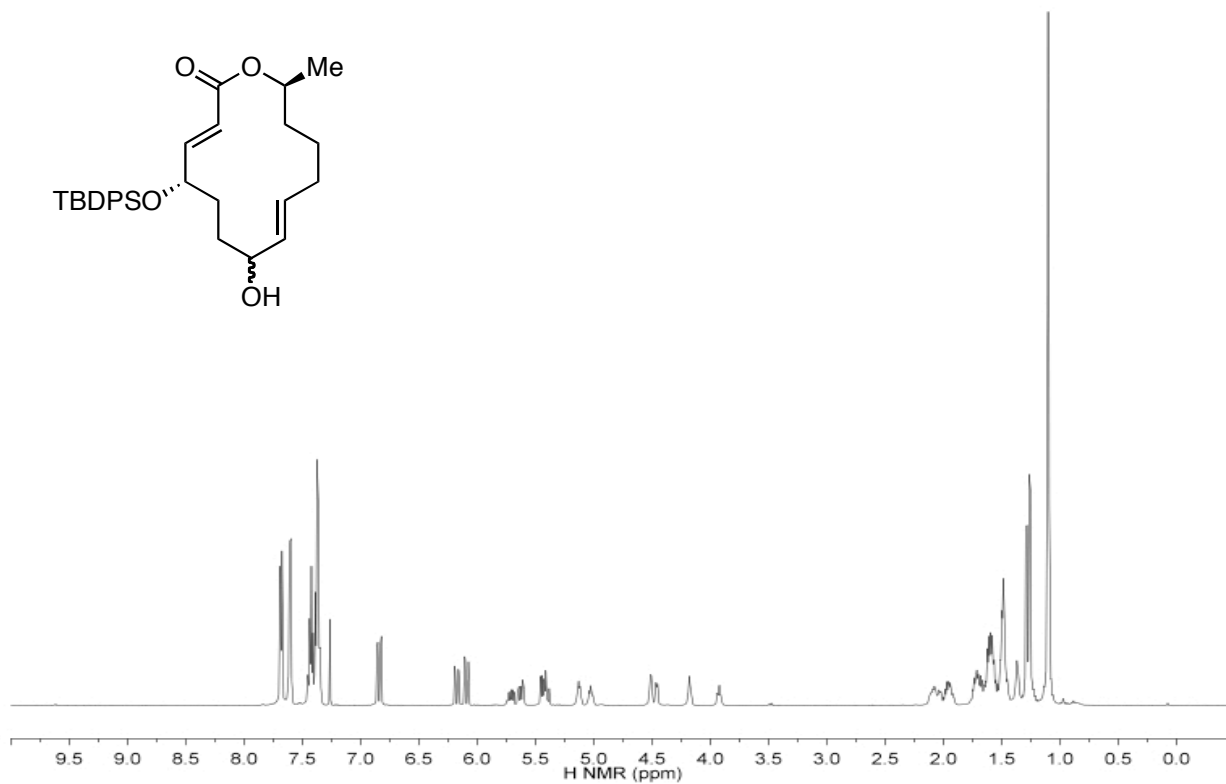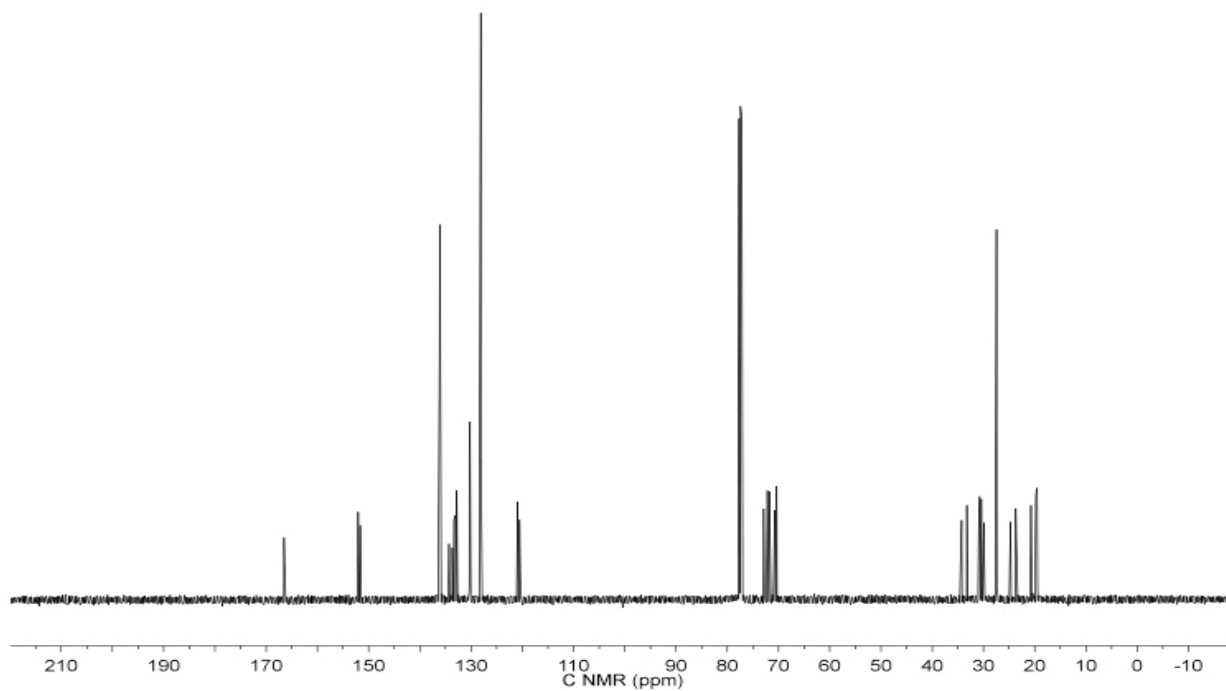

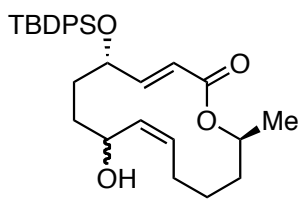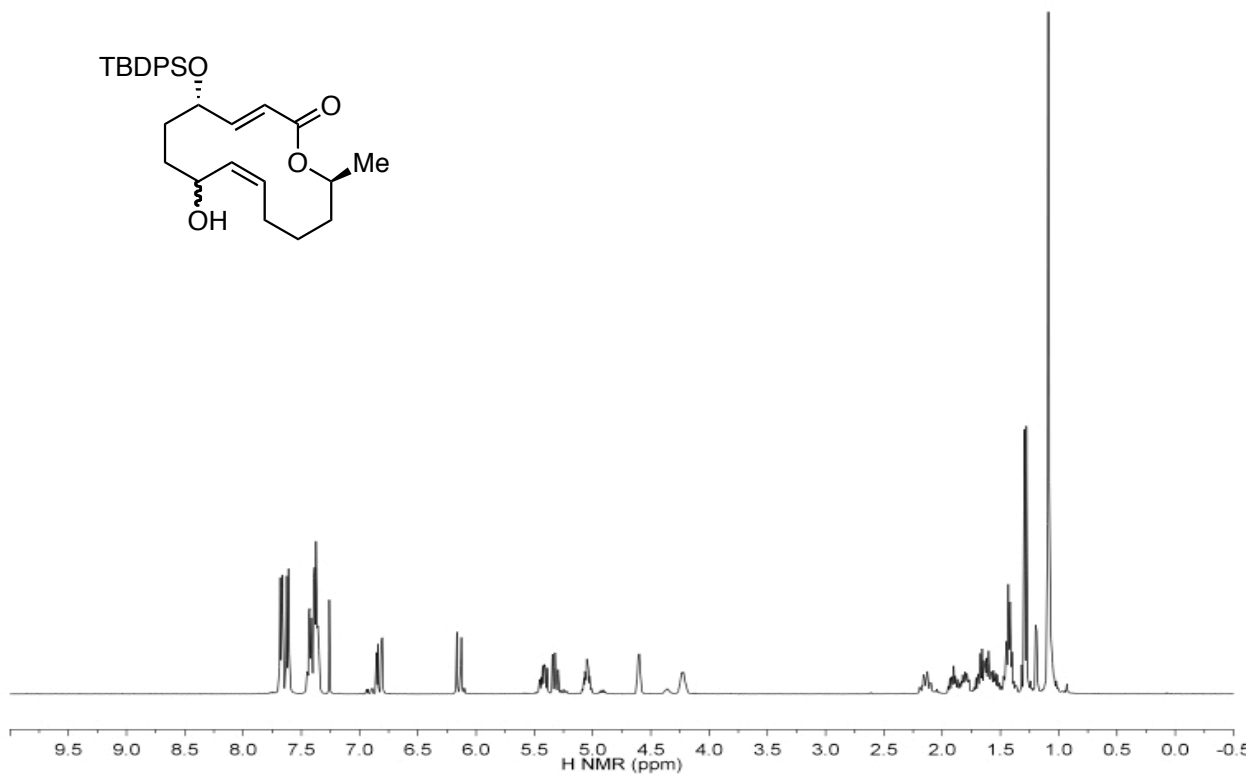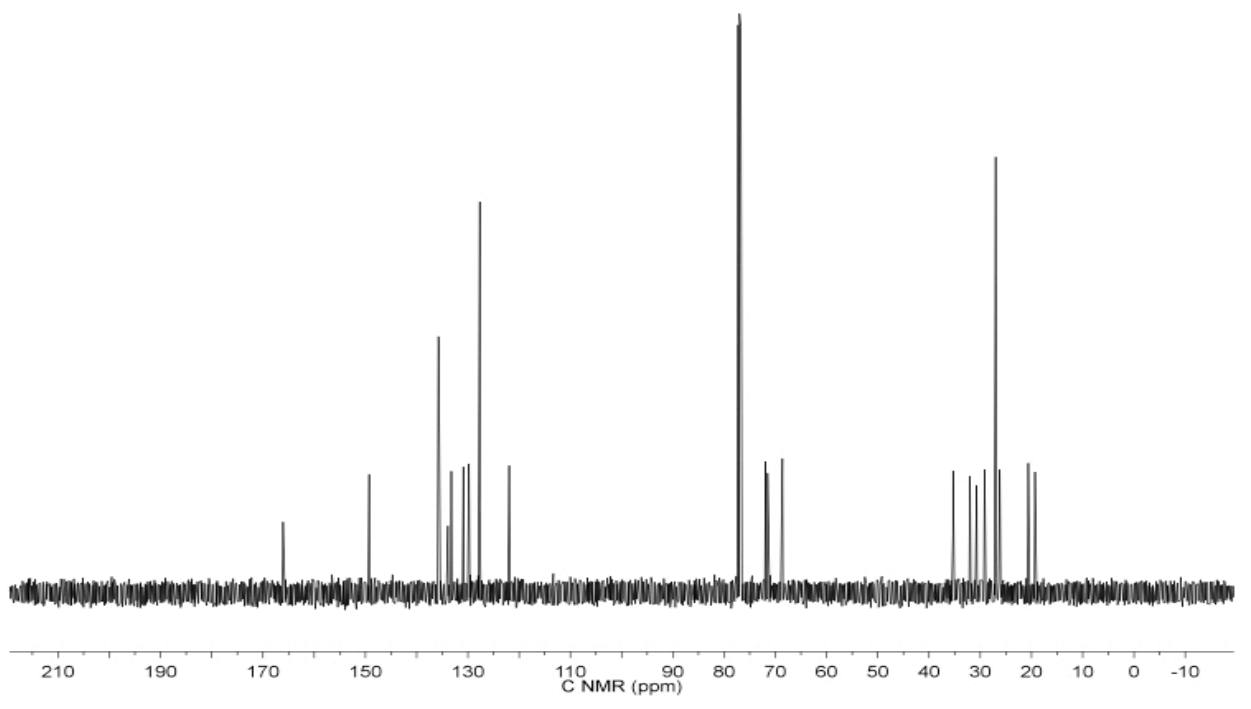





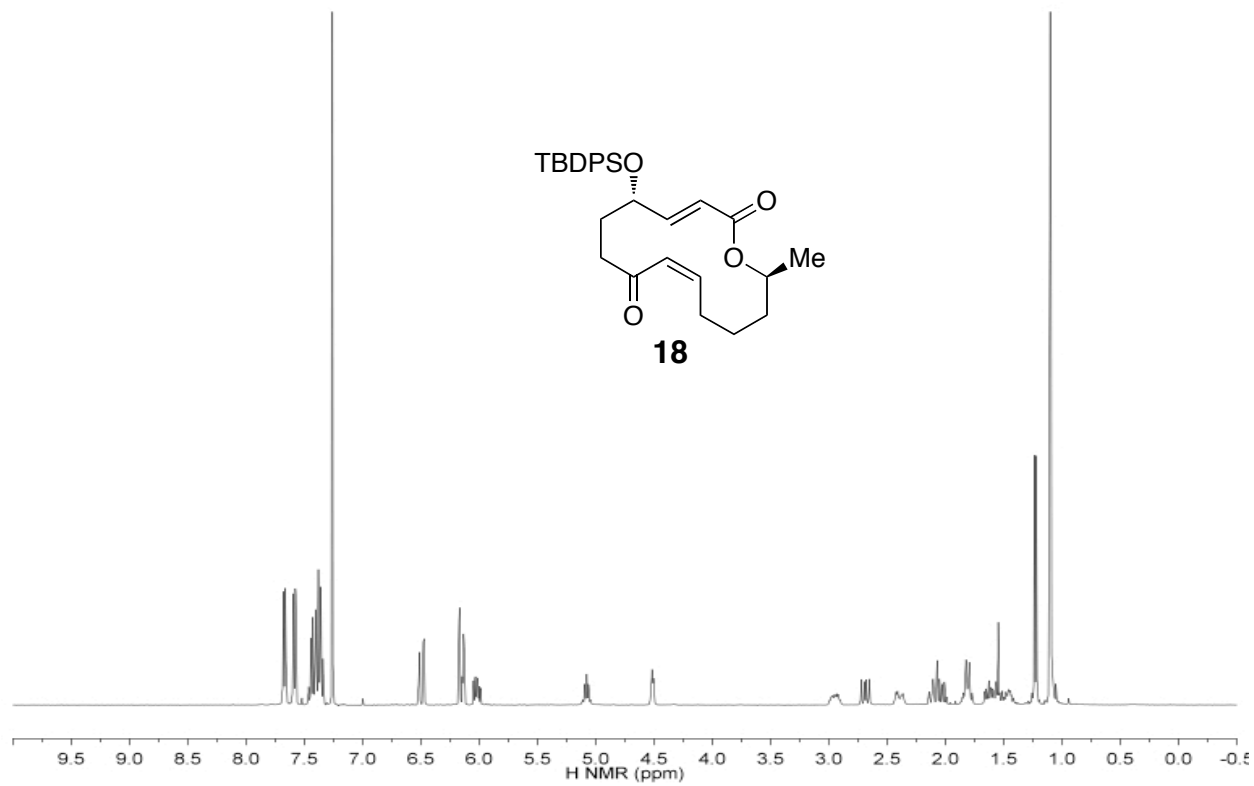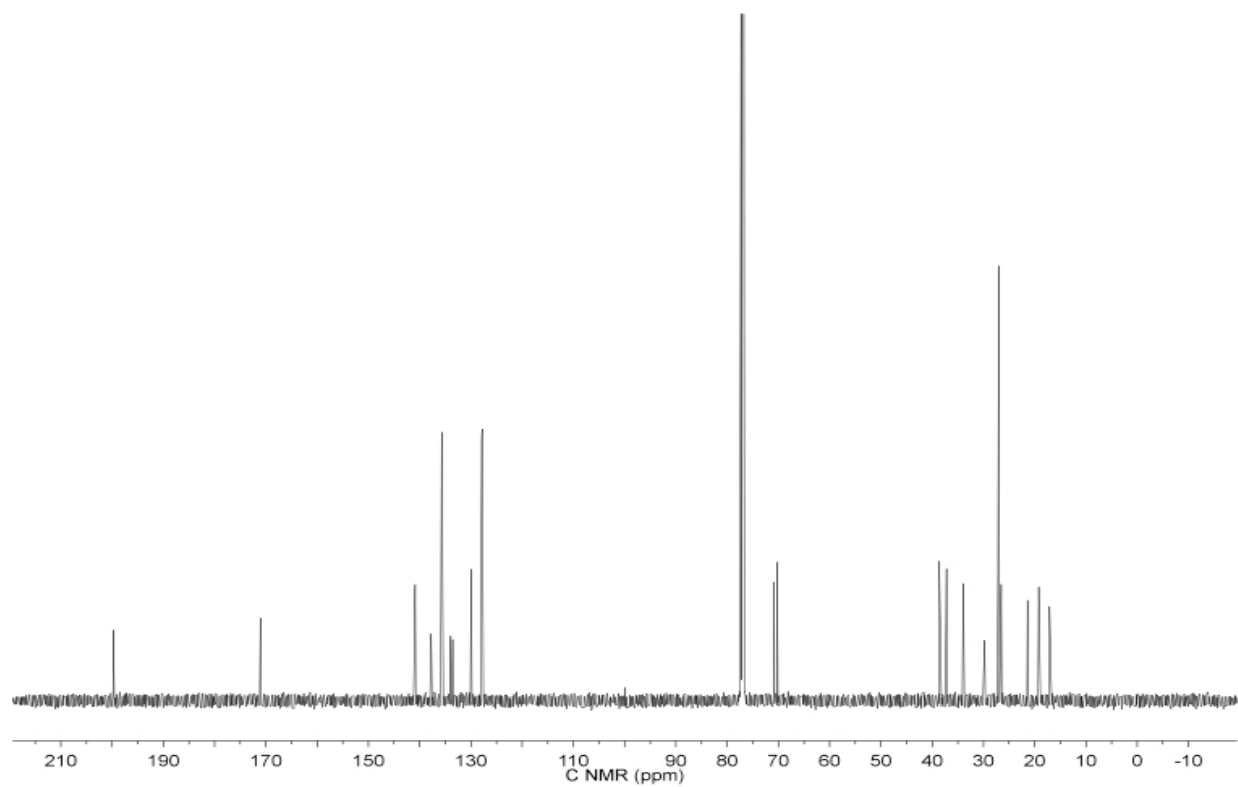



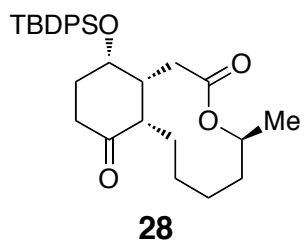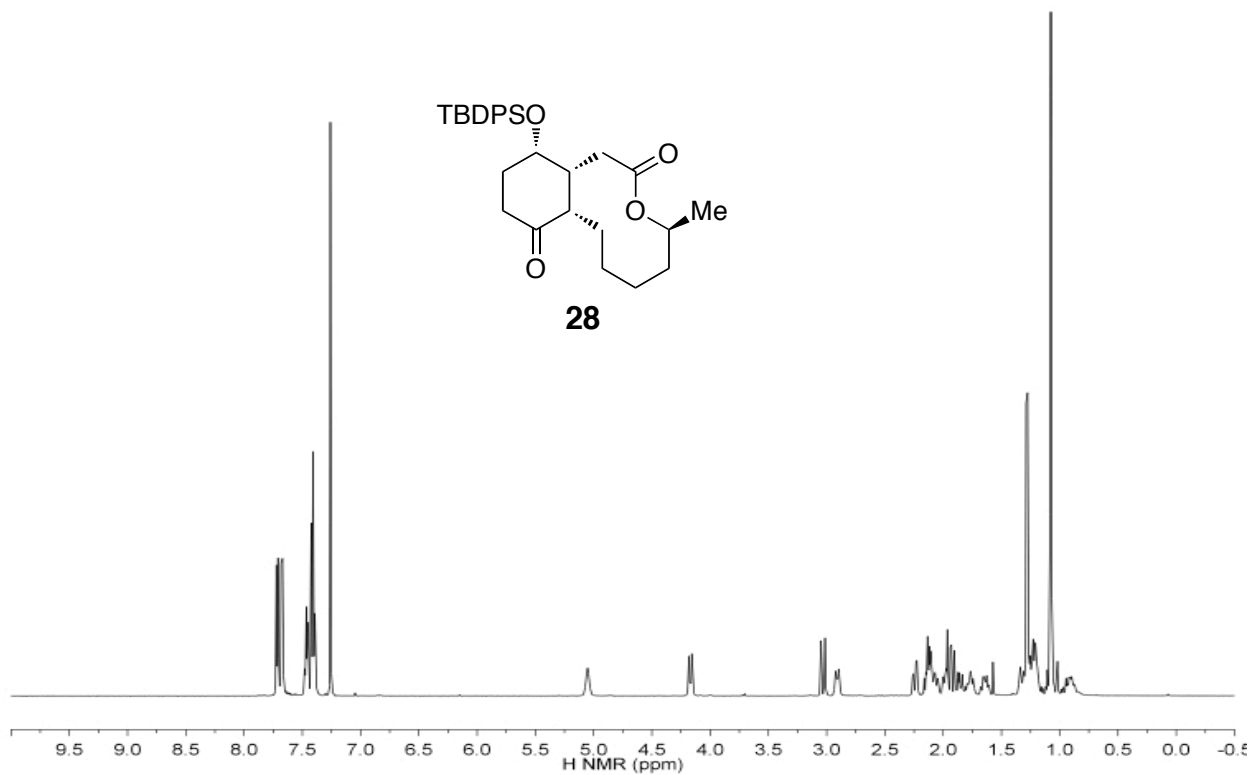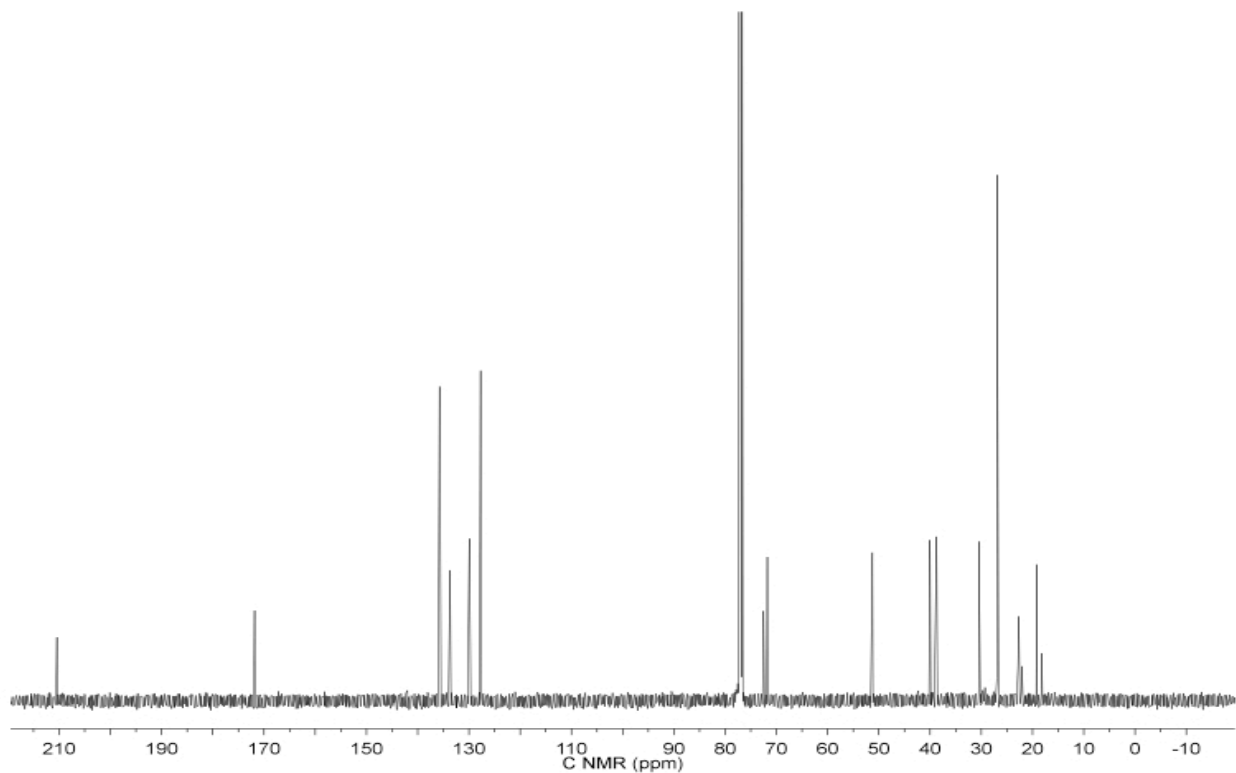

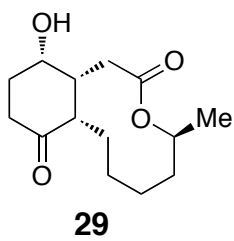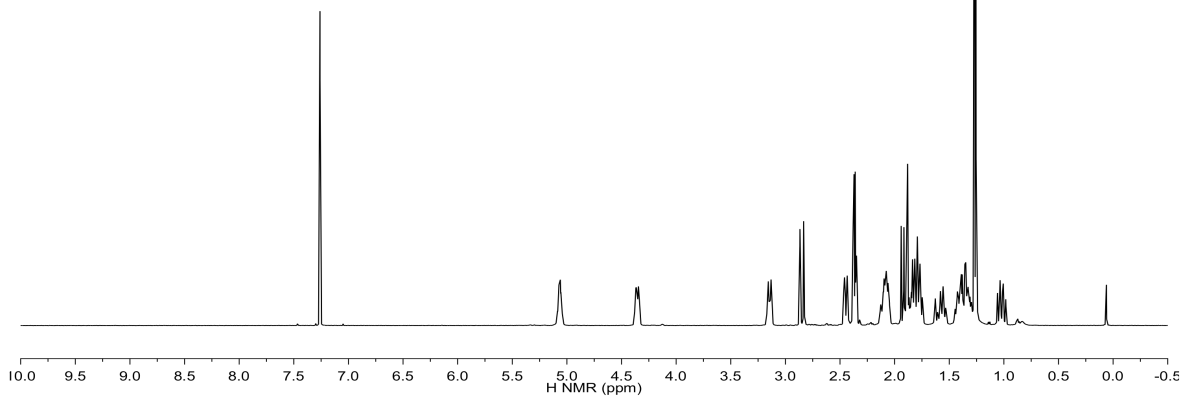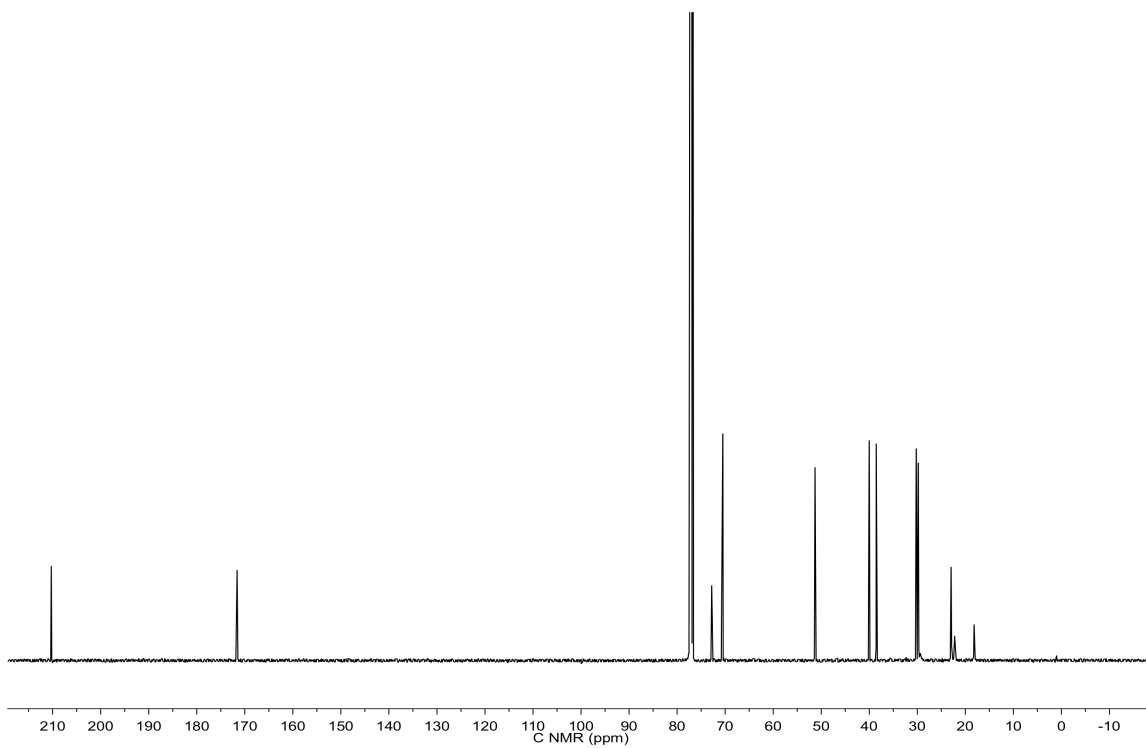

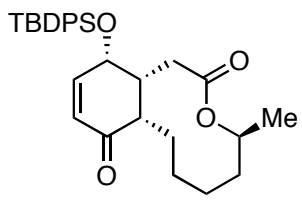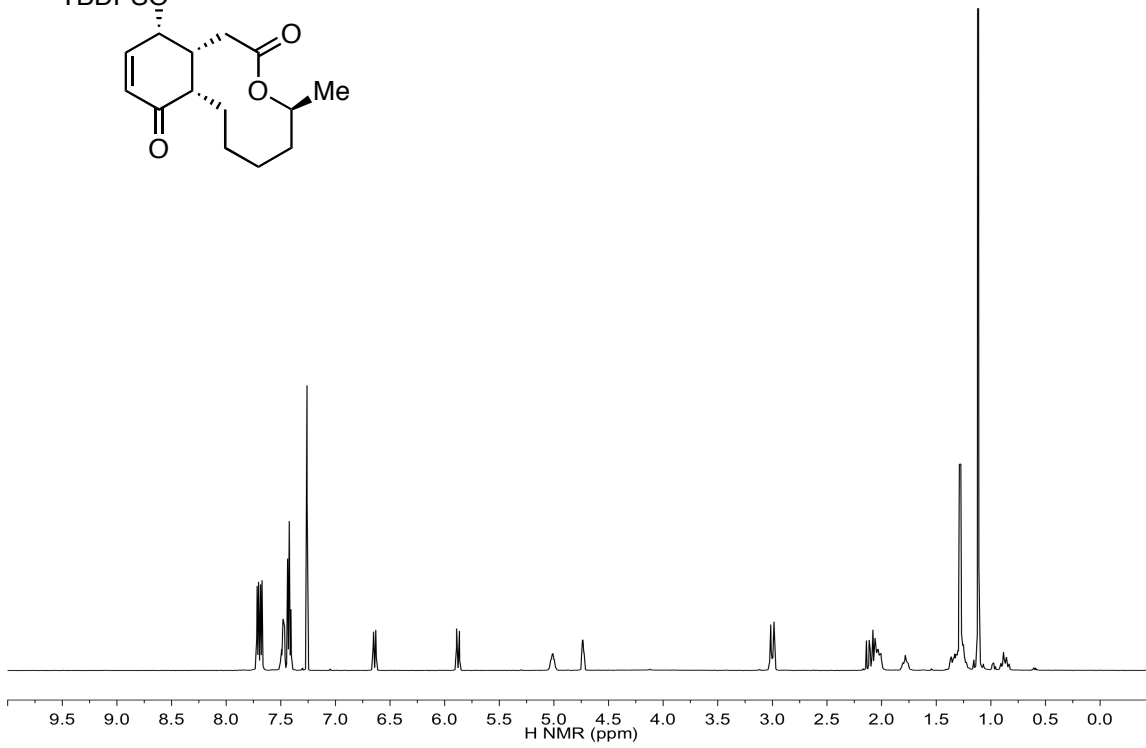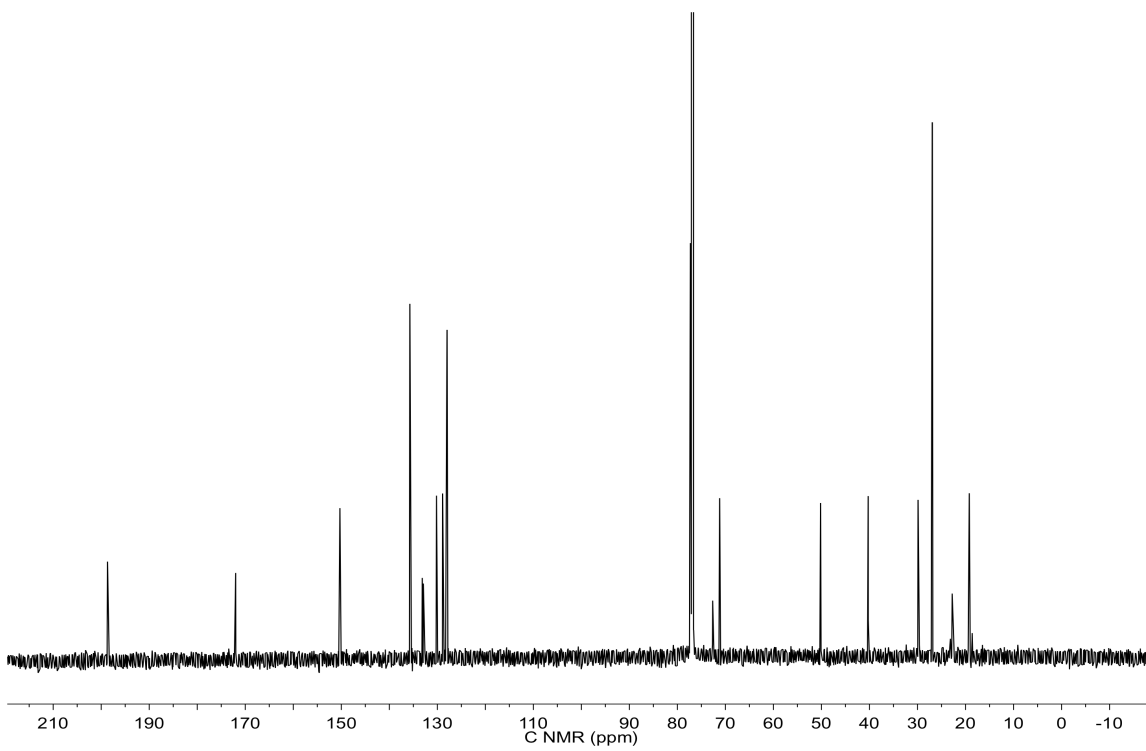



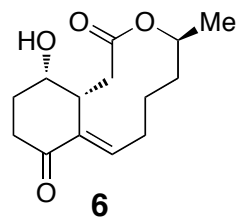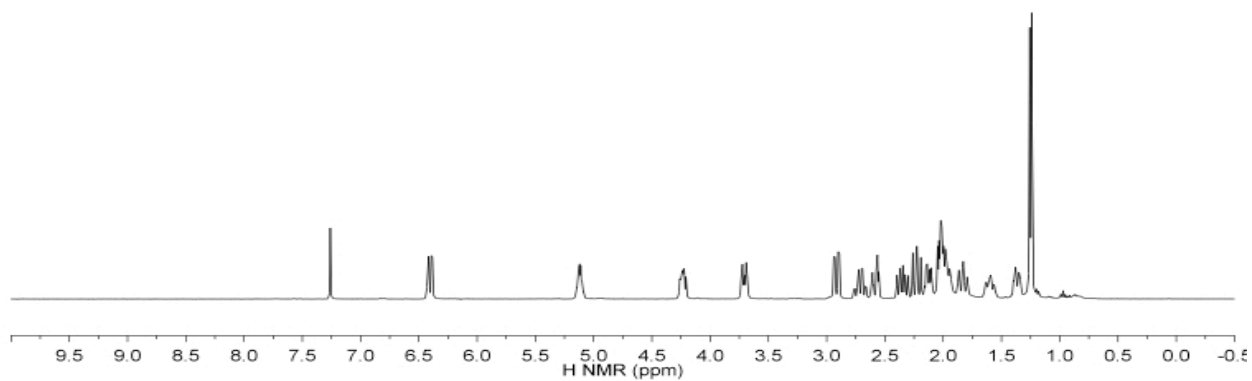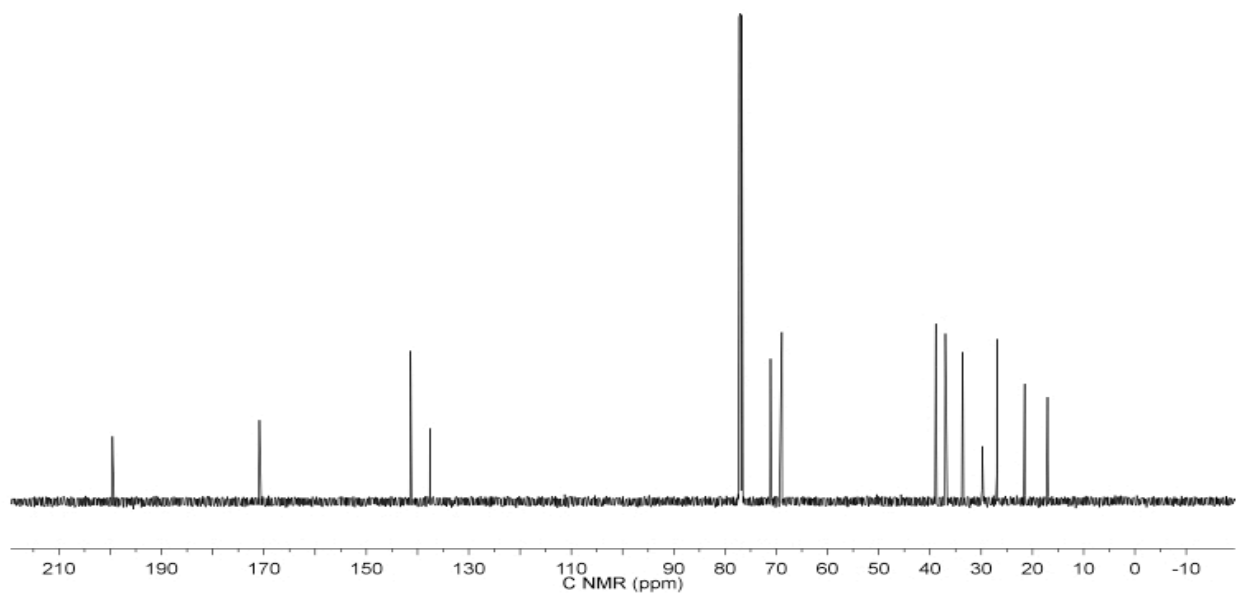



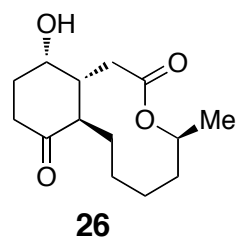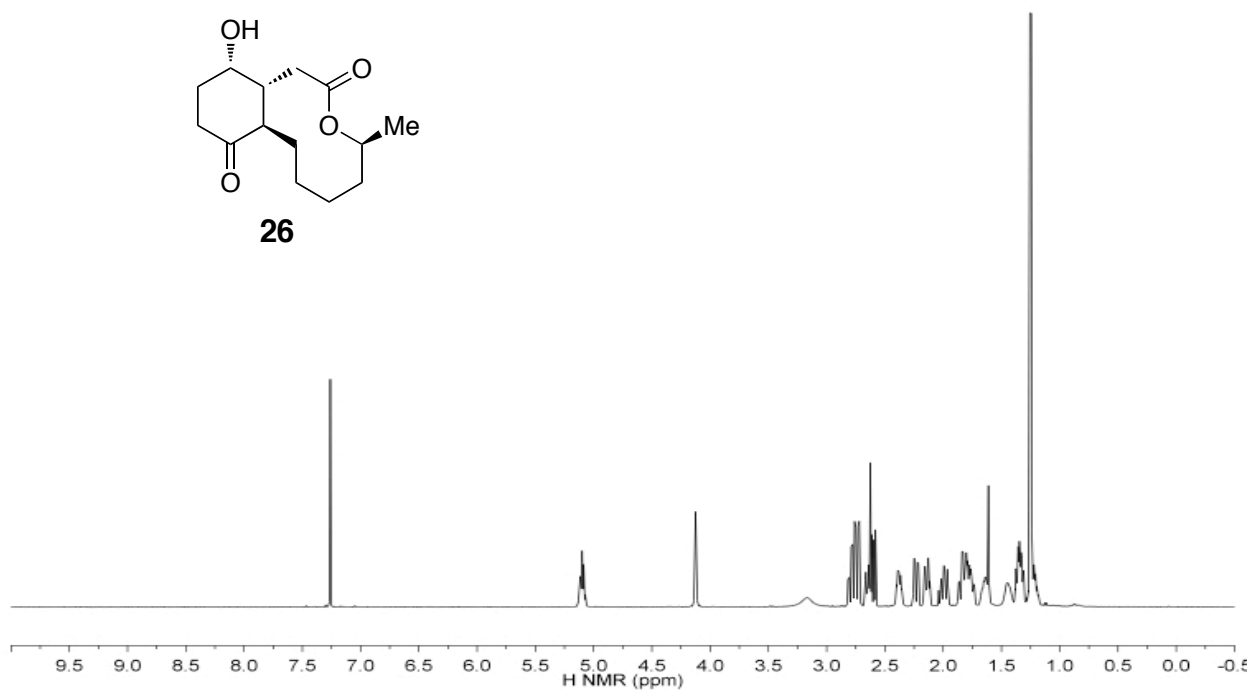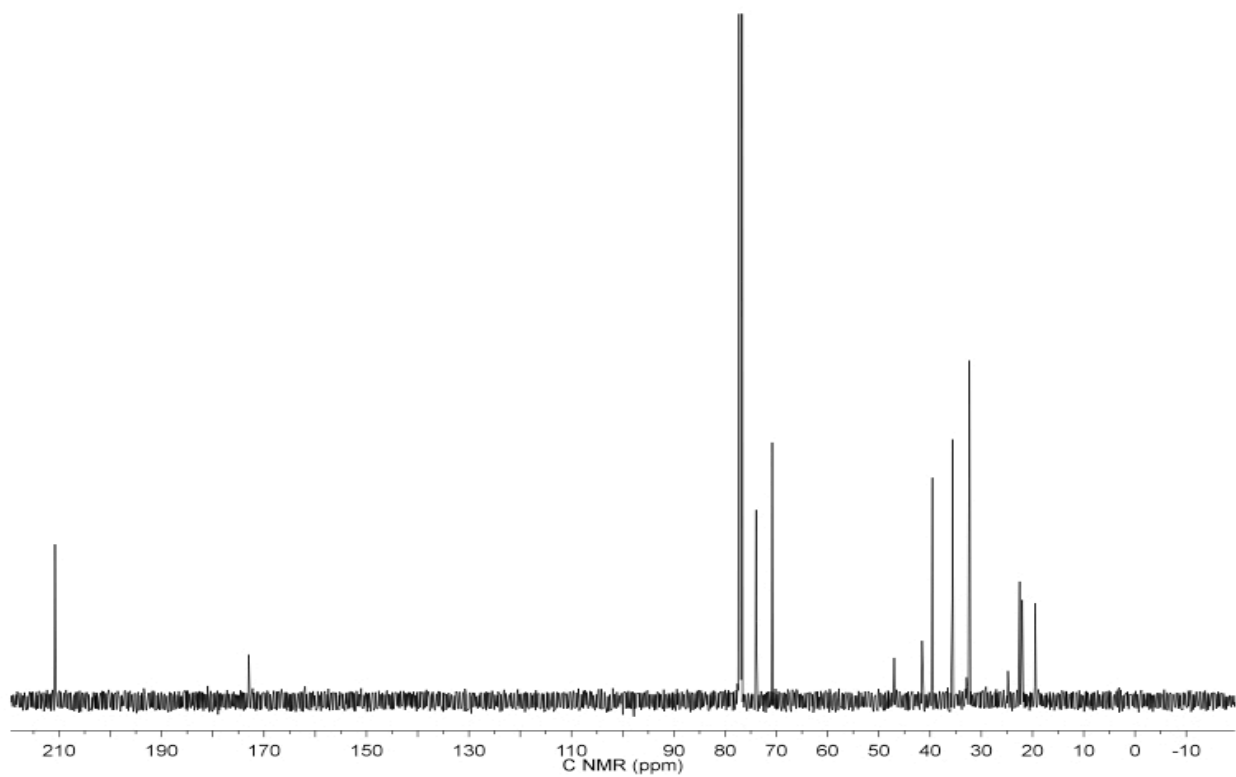

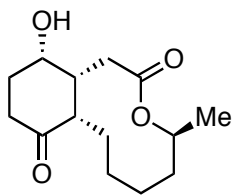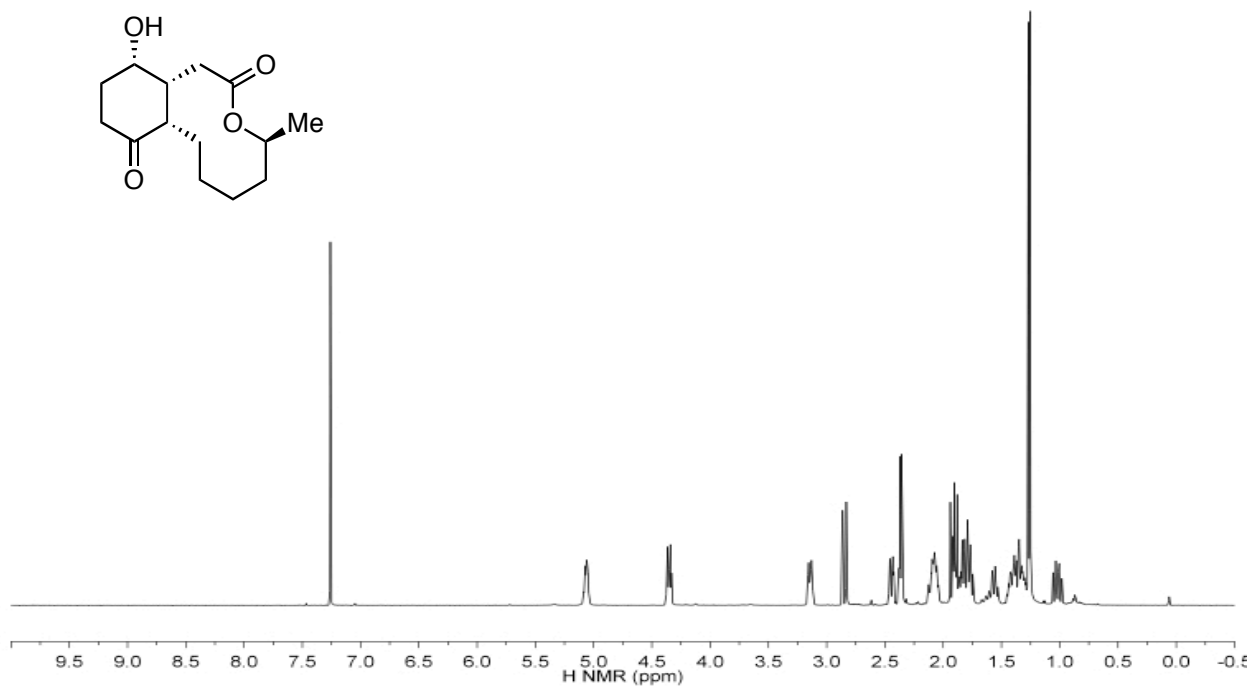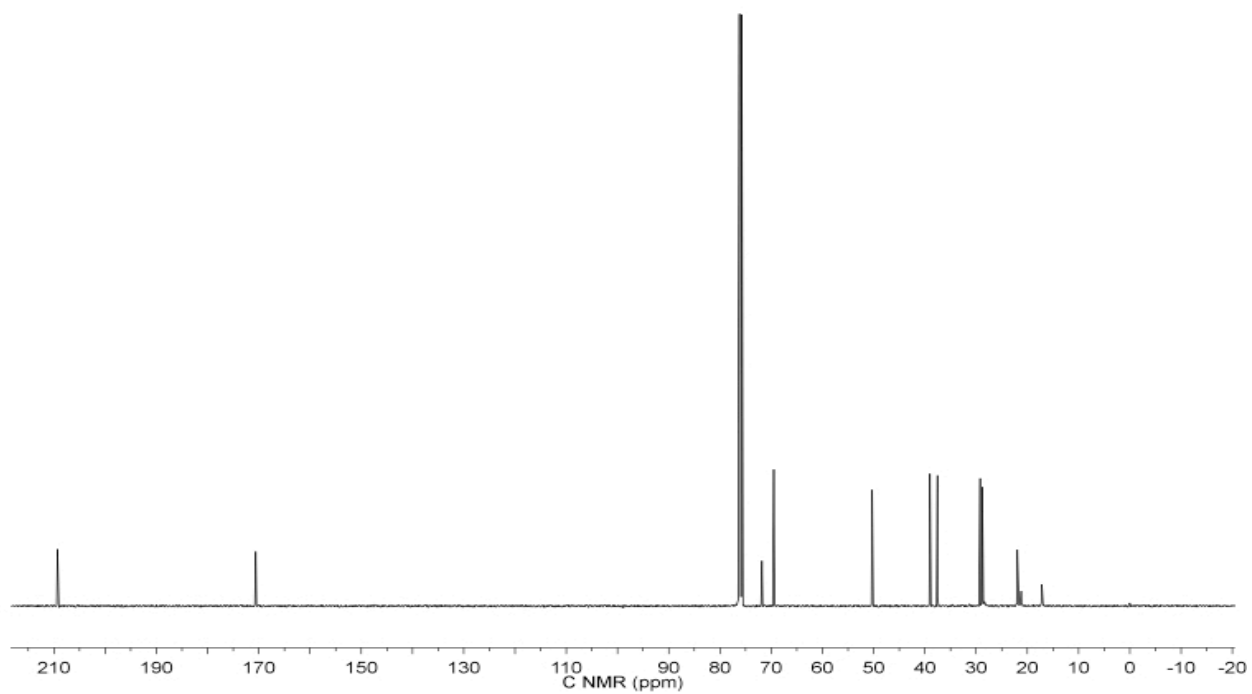

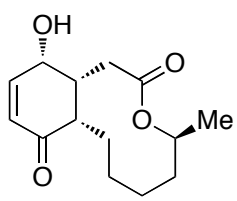

***epi*-Sch-642305**

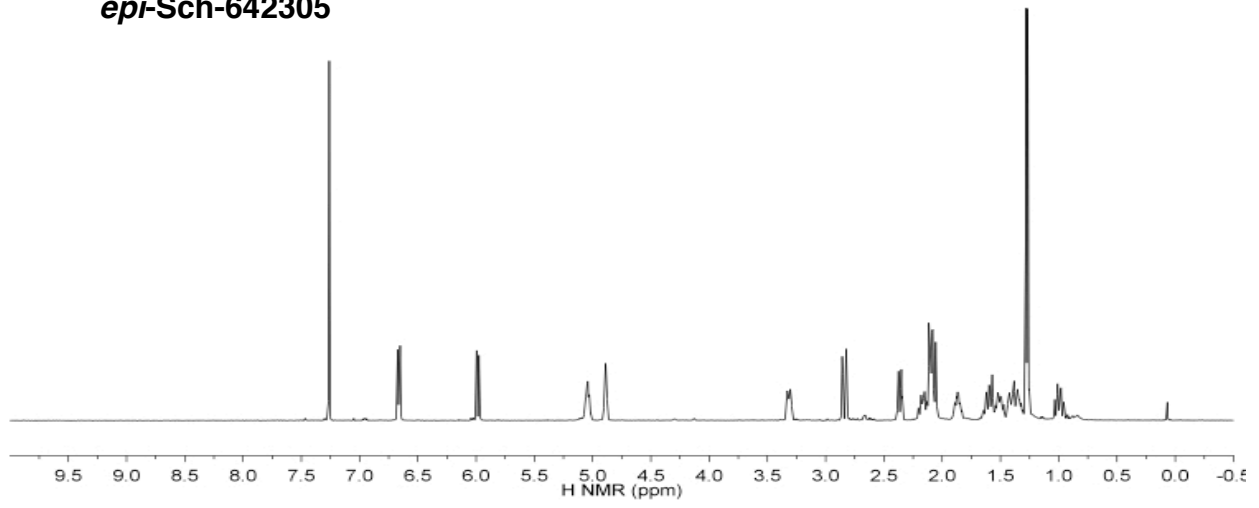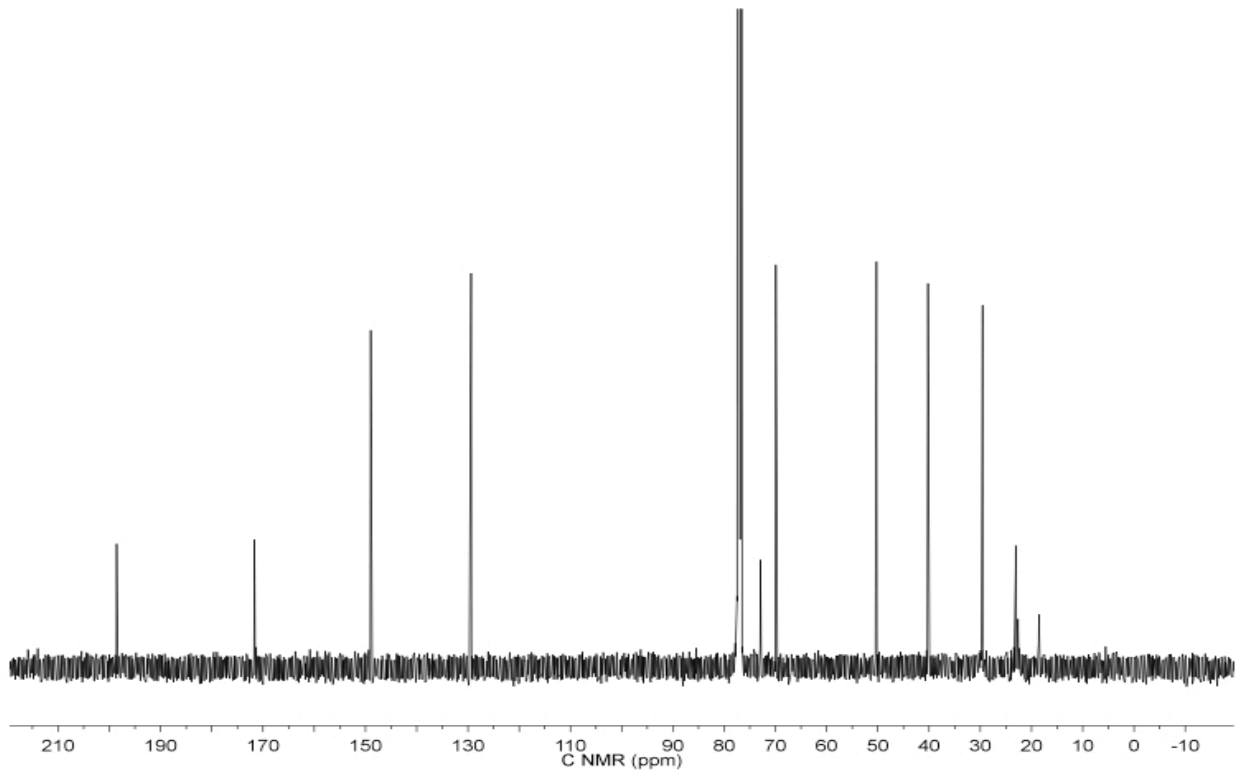

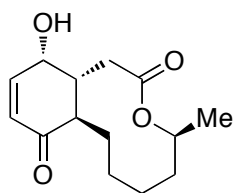

Sch-642305

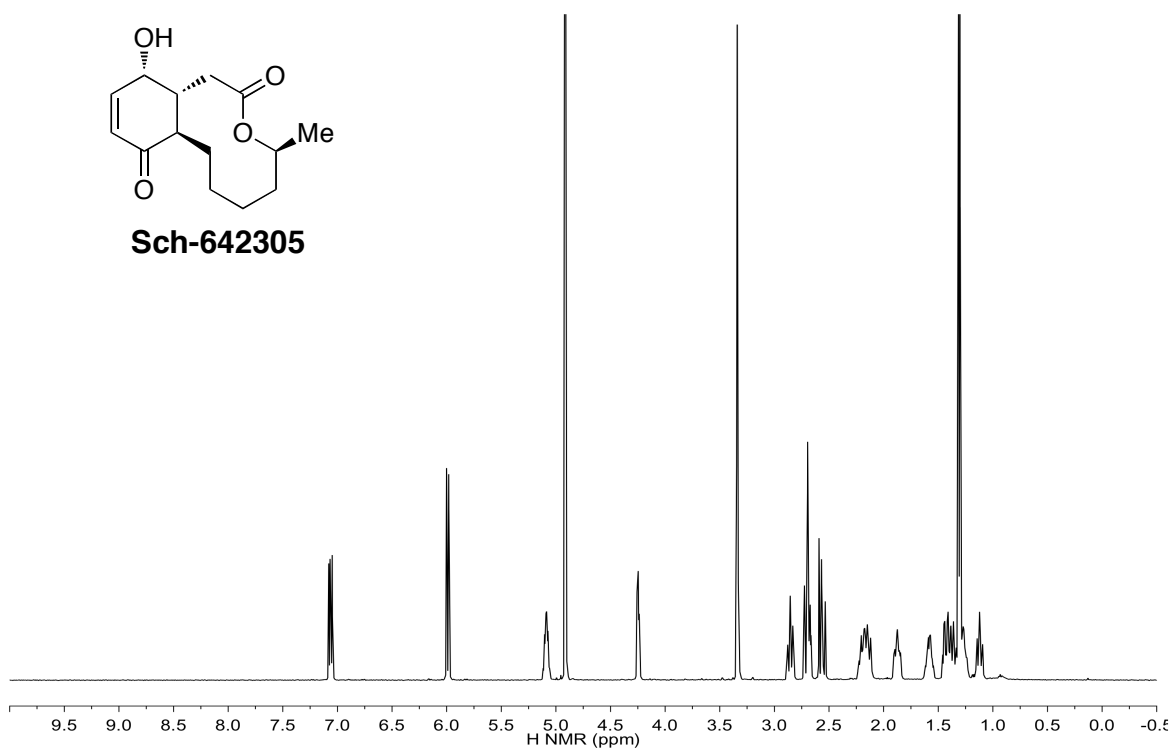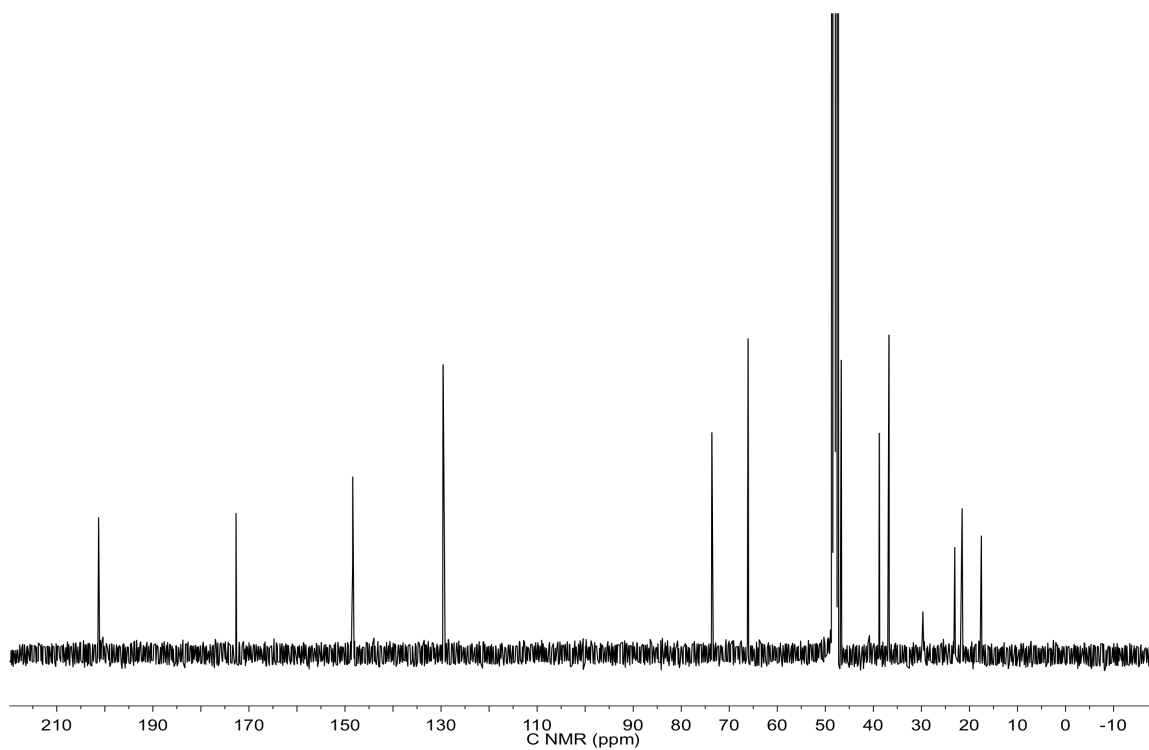

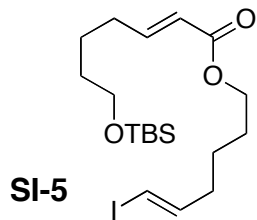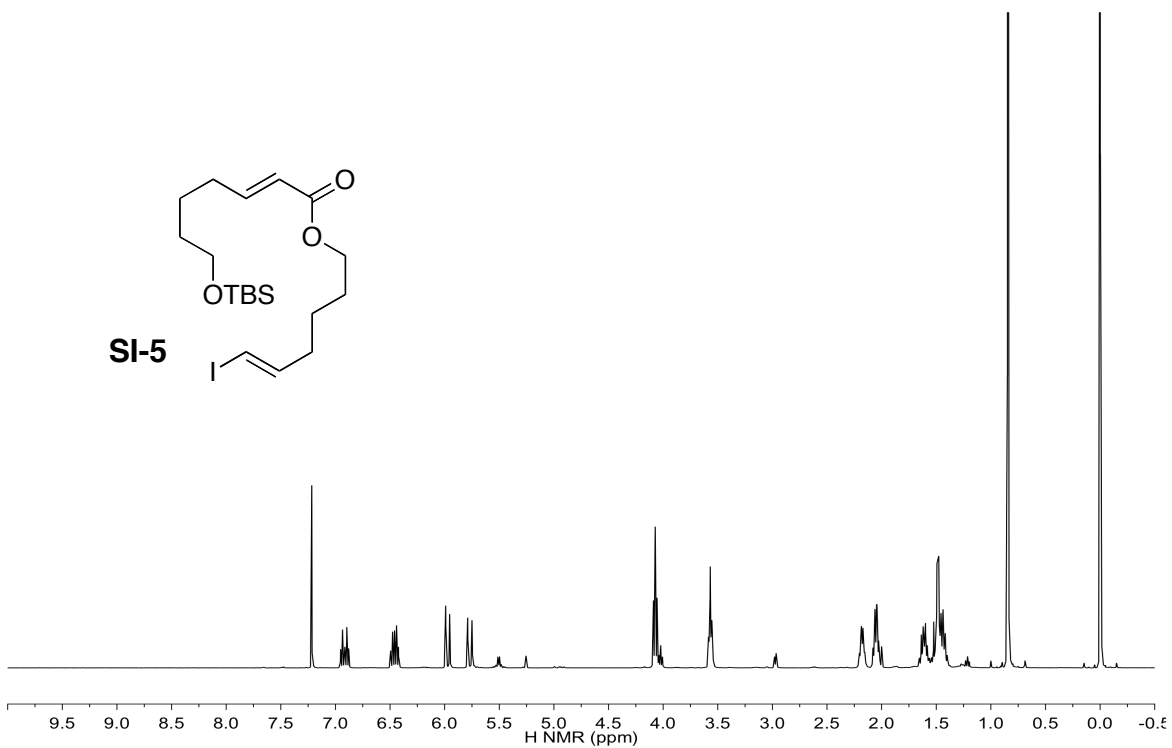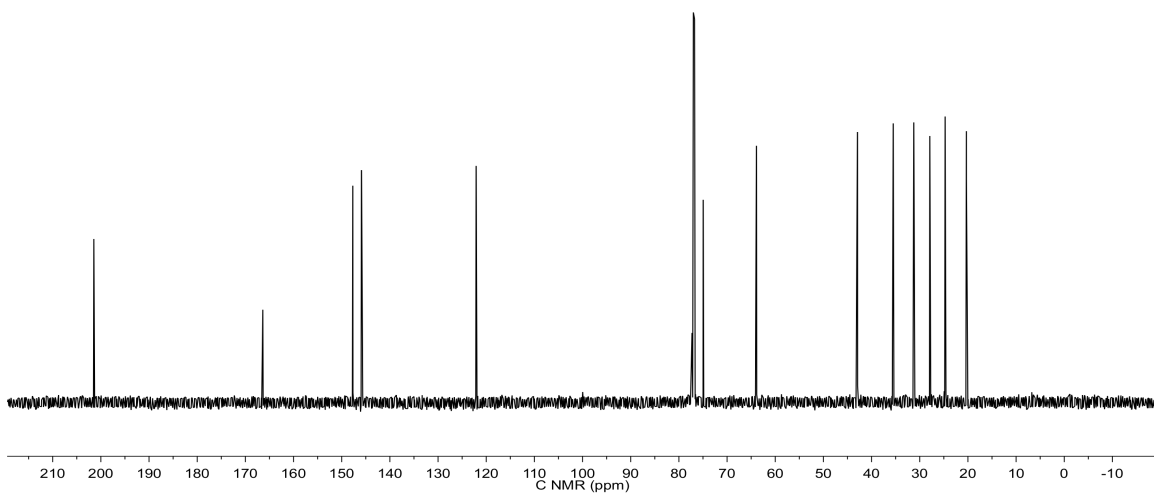

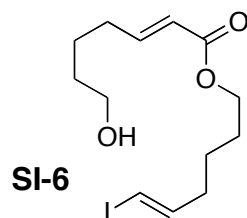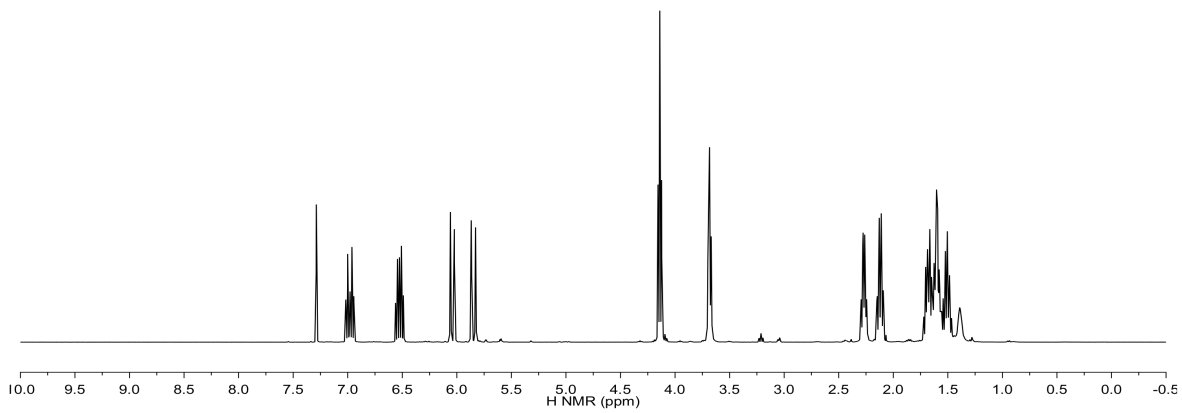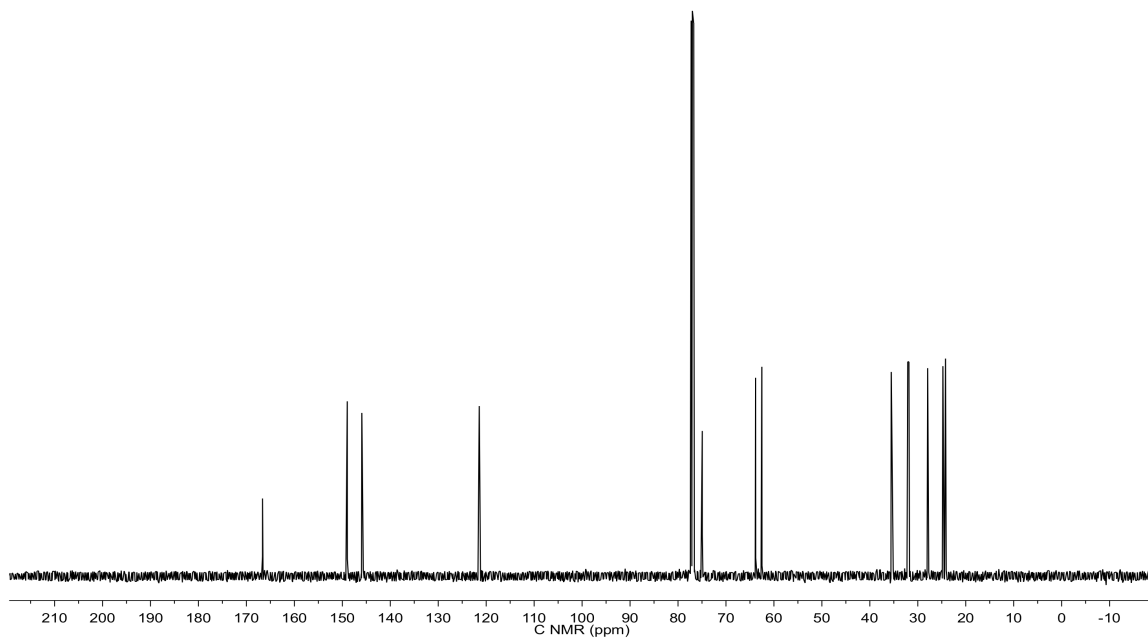

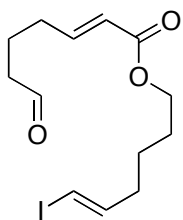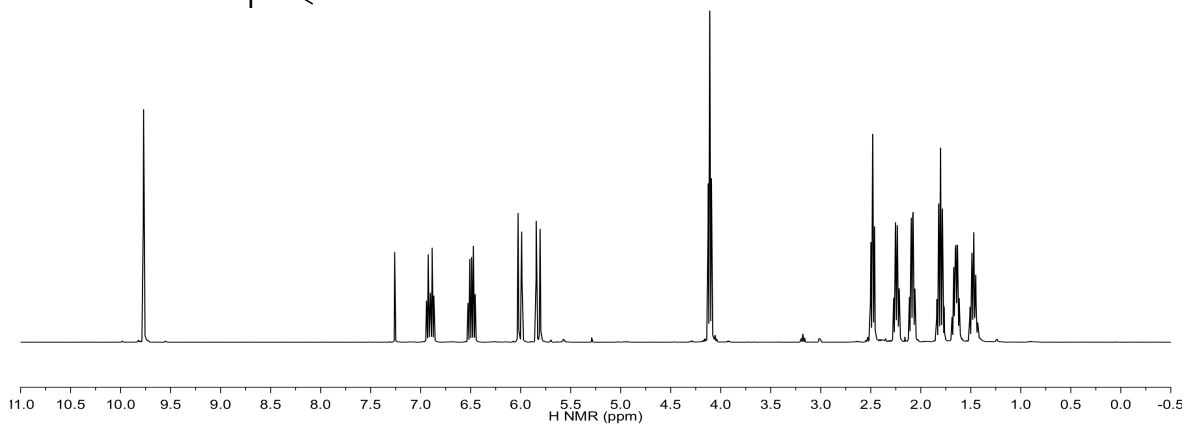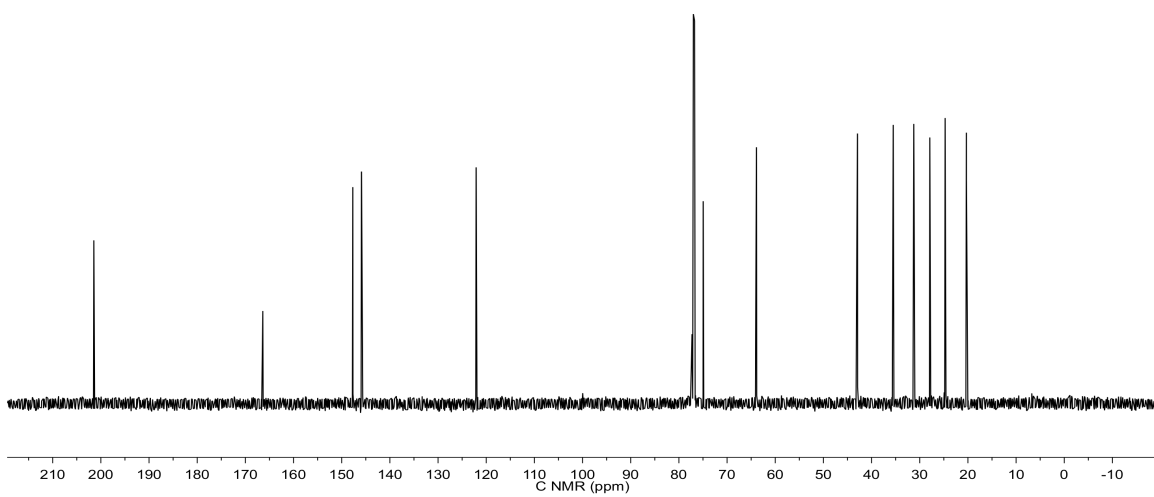

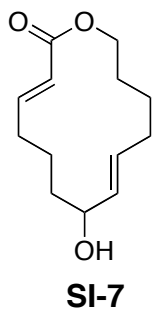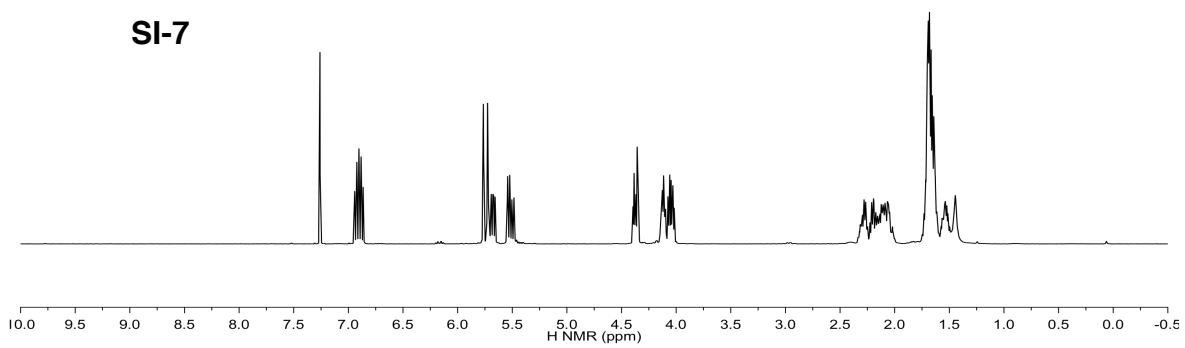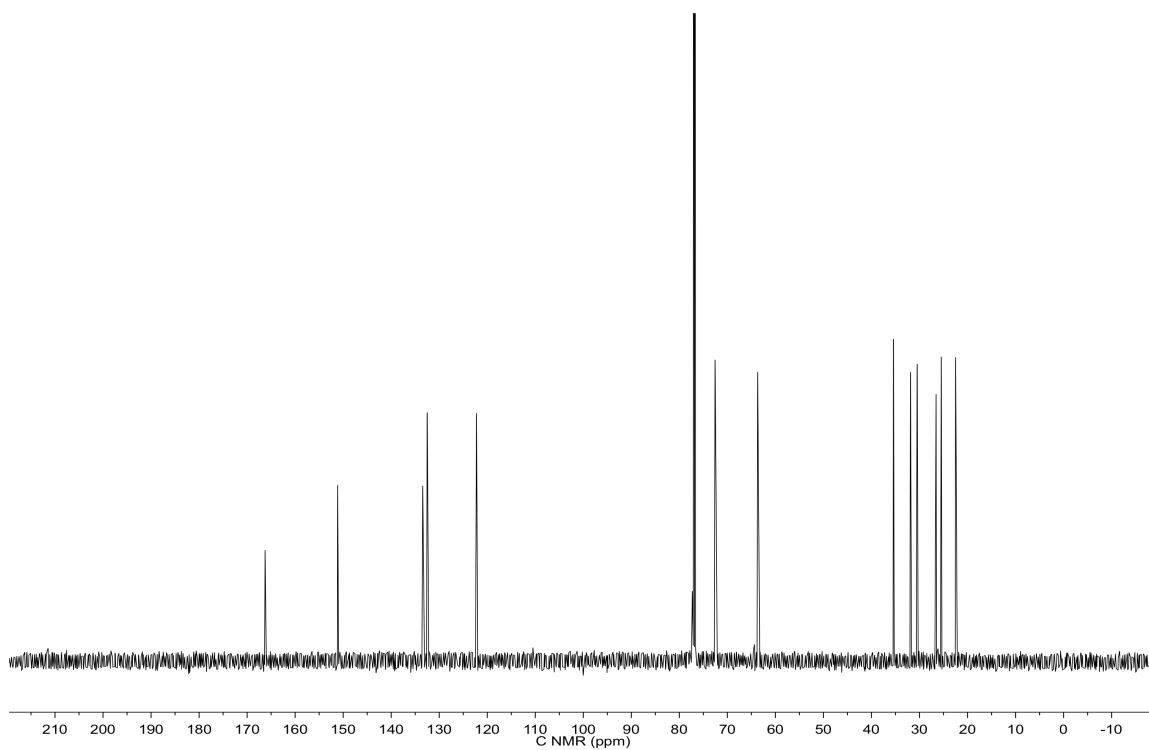



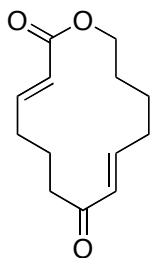

24

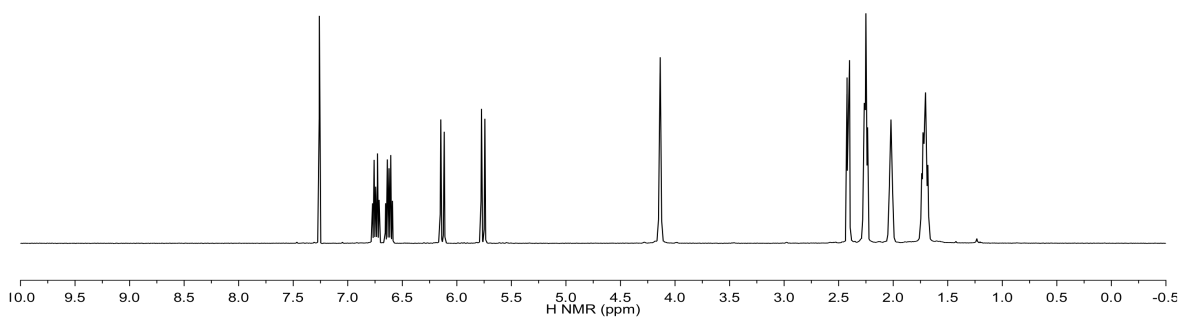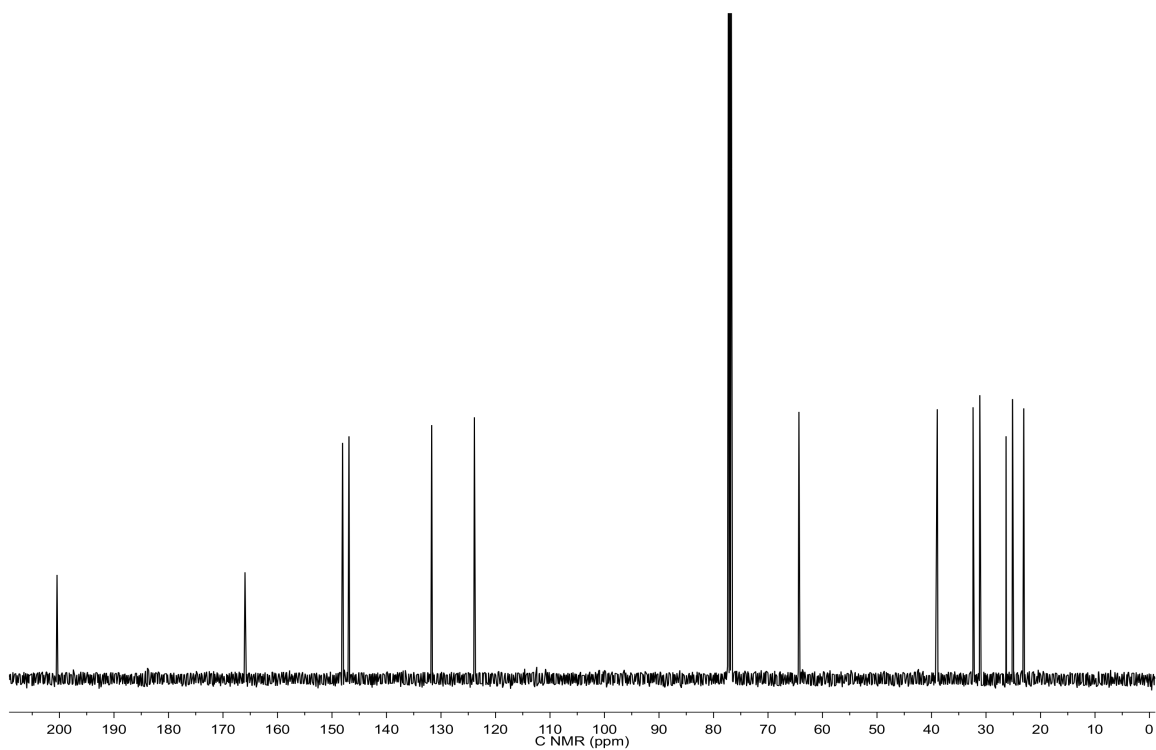

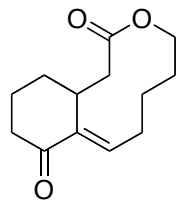

25

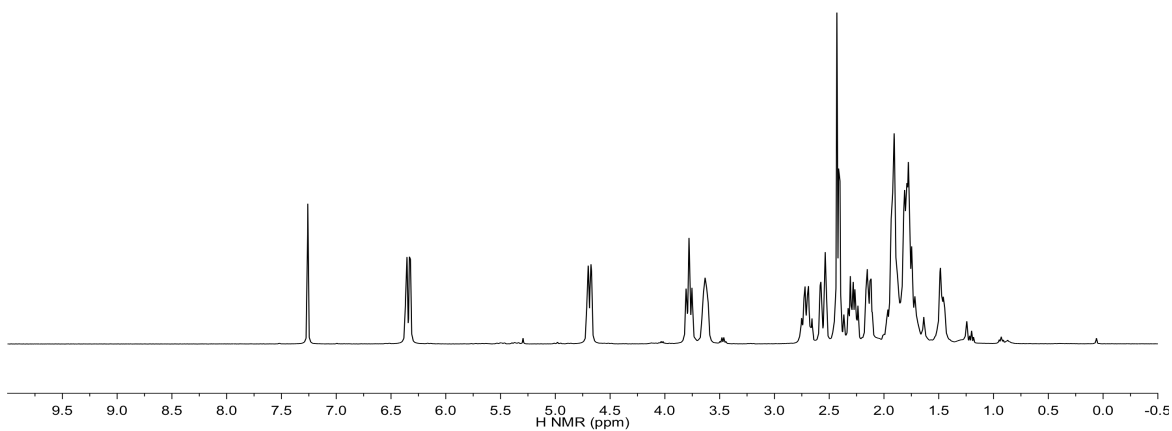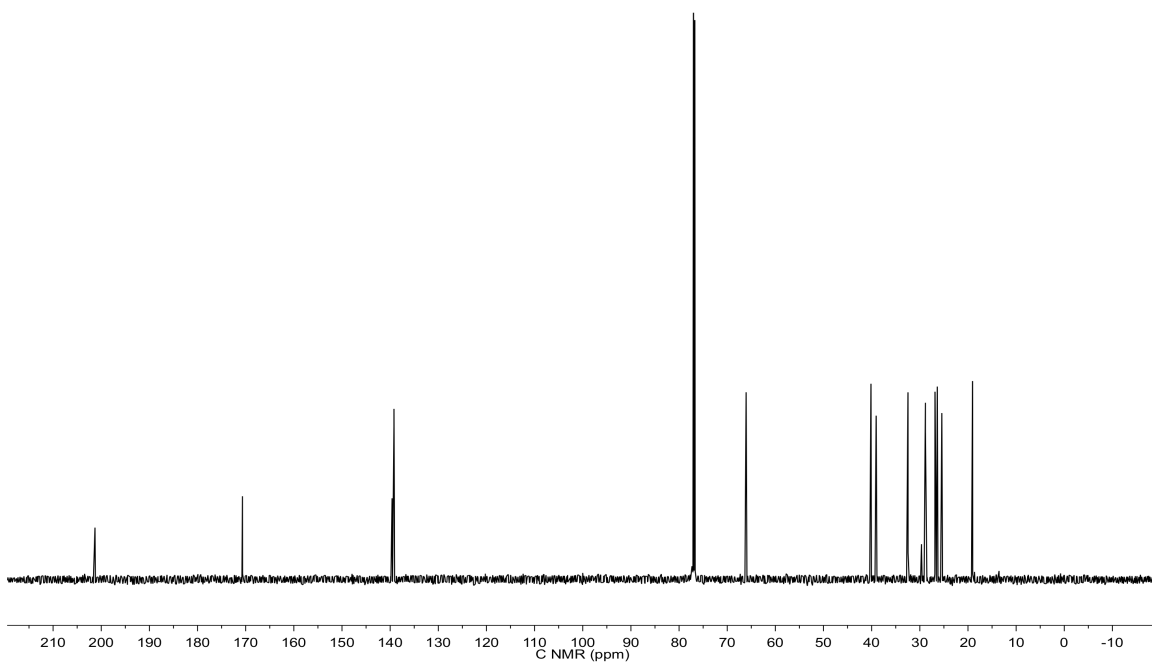

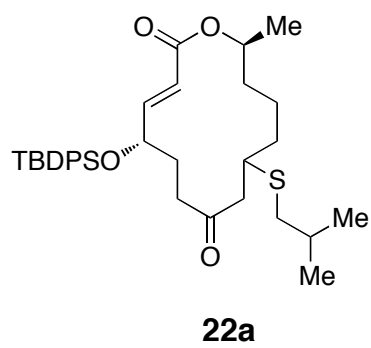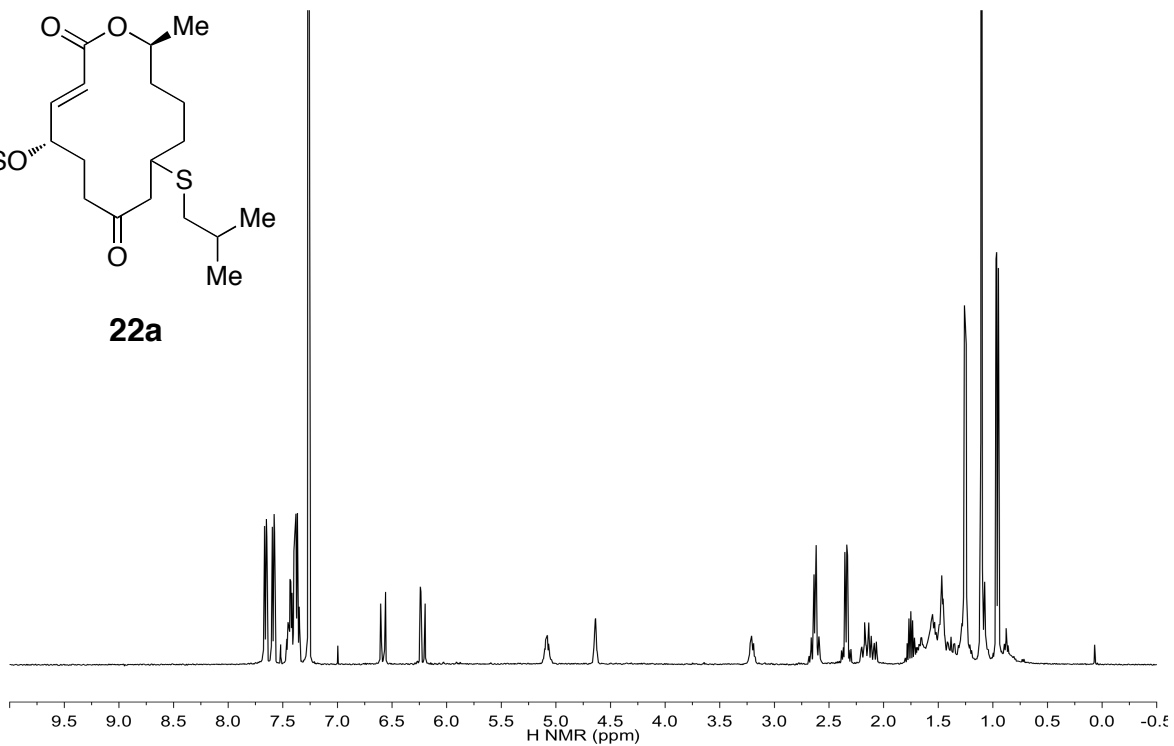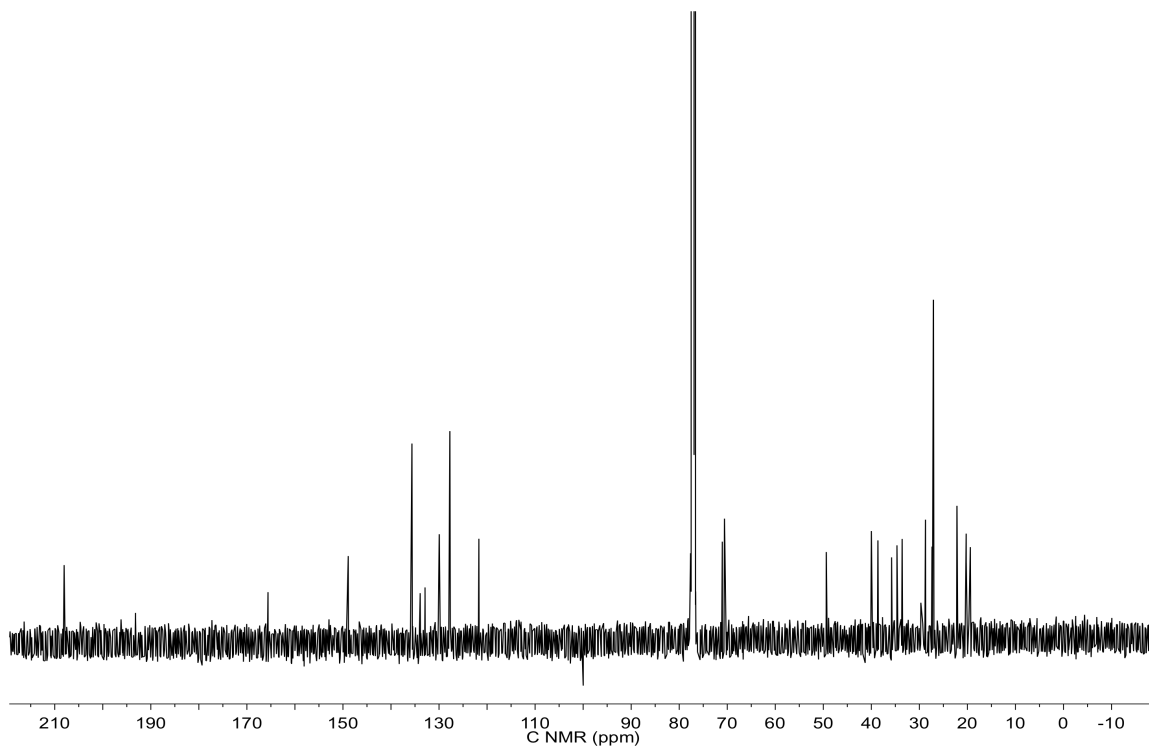

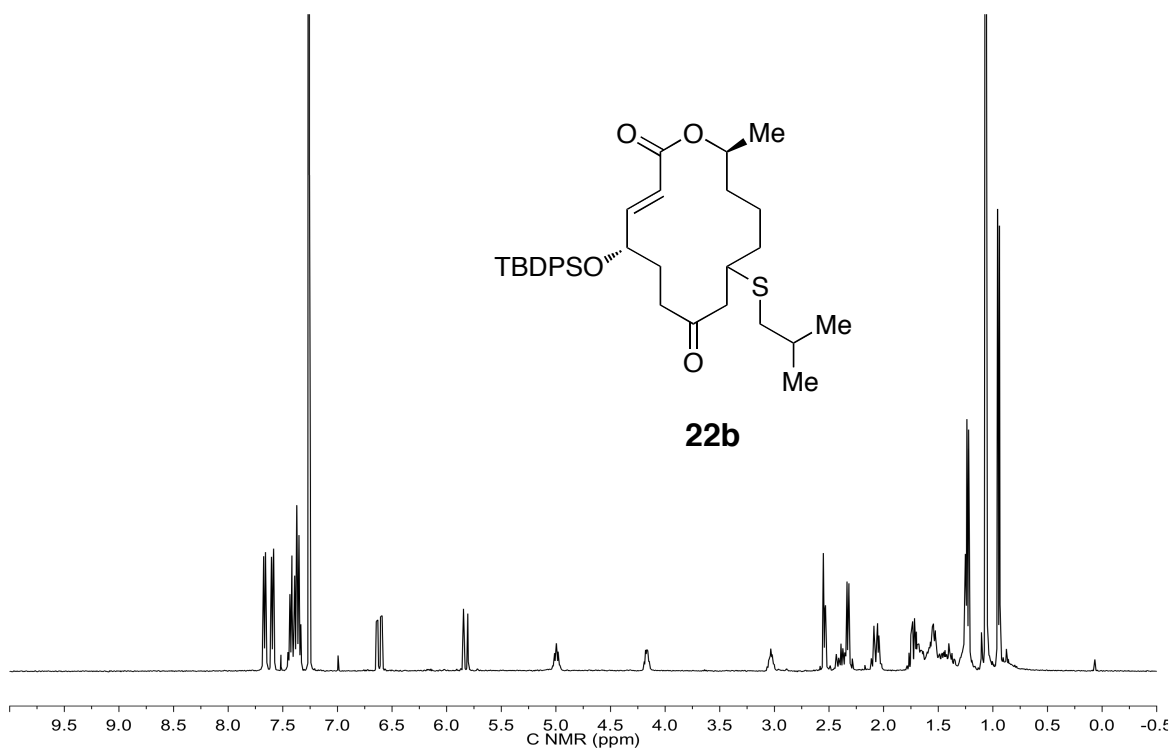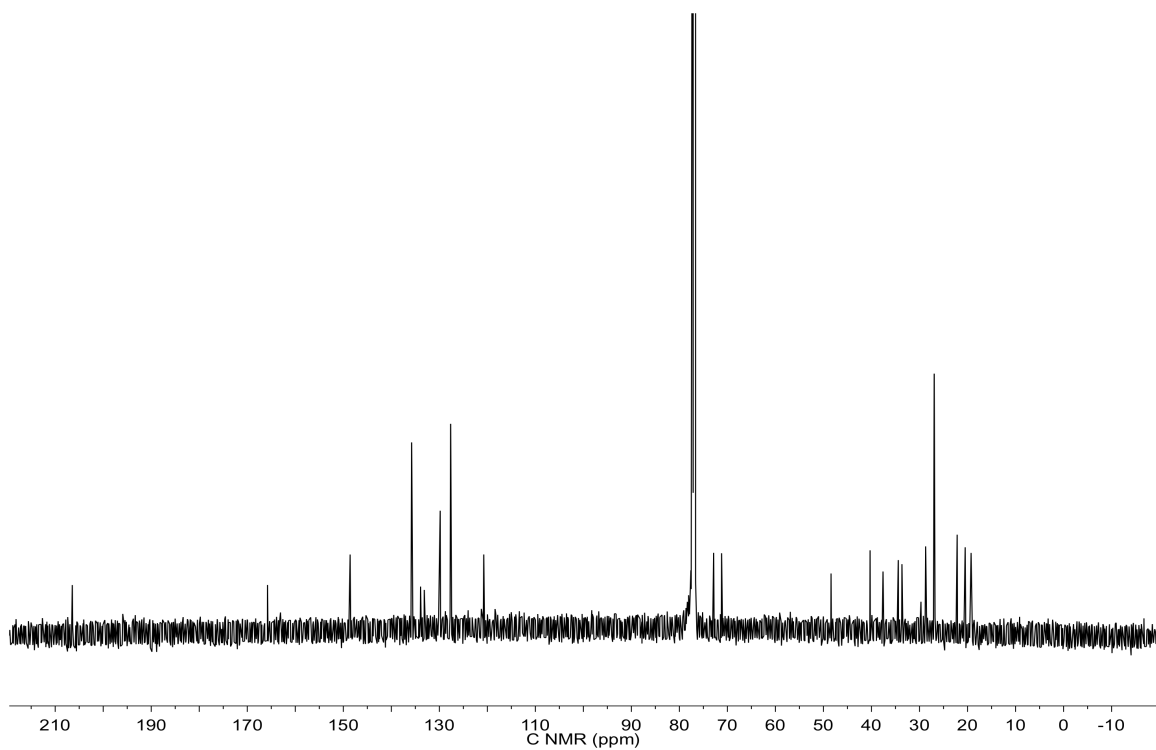

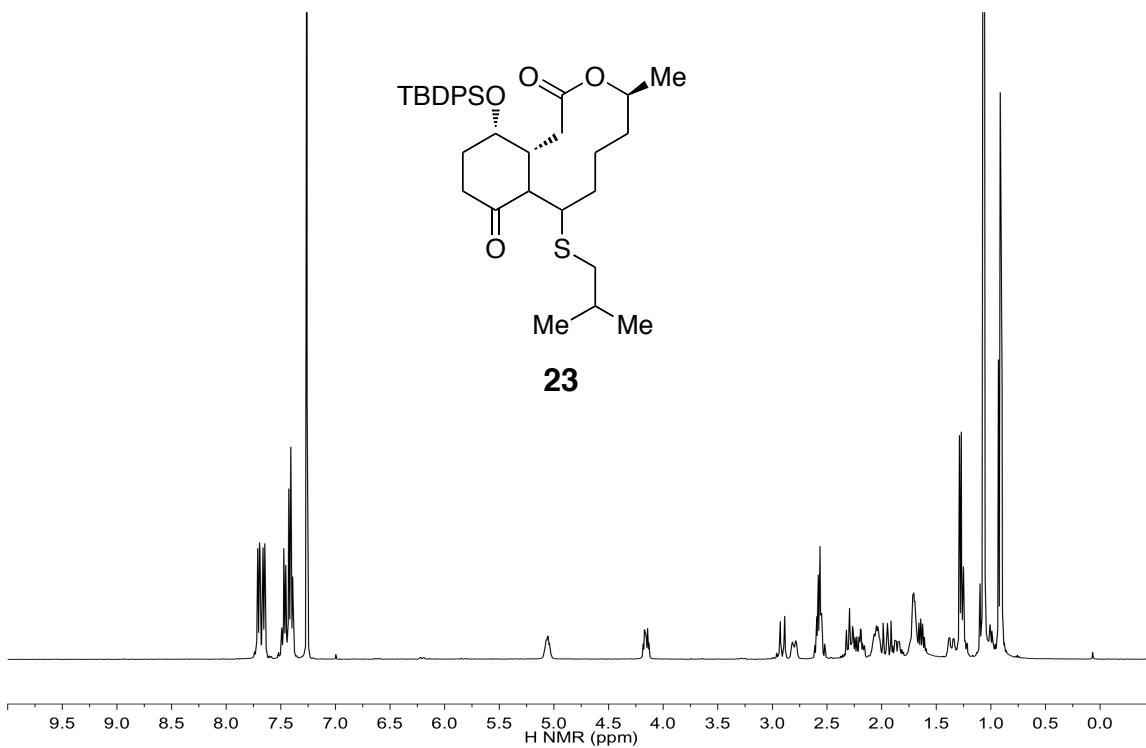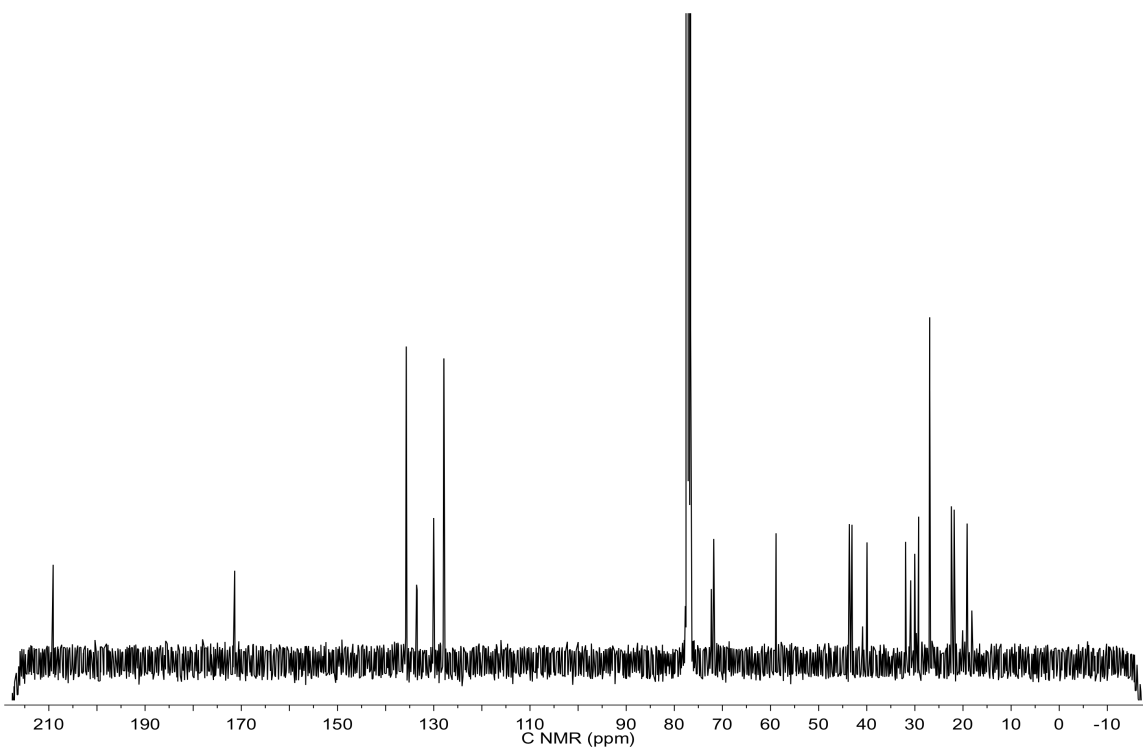

Supplement: NIHMS507915-supplement-Supplementary2.pdf [file NIHMS507915-supplement-Supplementary2.pdf]
